# Supplementary material for: Different types of plantar vibration affect gait characteristics differently while walking on different inclines
Source: PeerJ. 2023 Jan 9;11:e14619. doi: 10.7717/peerj.14619 (PMC9835691; doi:10.7717/peerj.14619)
Supplement: Supplemental Information 1 [file peerj-11-14619-s001.xlsx]

## Sheet: step time
avg	uphill15_Sub	uphill15_No	uphill15_Supra	uphill8_Sub	uphill8_No	uphill8_Supra	level_Sub	level_No	level_Supra	downhill8_Sub	downhill8_No	downhill8_Supra	downhill15_Sub	downhill15_No	downhill15_Supra		Level_Sub (3 min)	Level_No (3 min)	Level_Supra (3 min)
sub01	0.499017	0.51136	0.511404	0.518929	0.518973	0.515575	0.509912	0.504655	0.513158	0.497436	0.490924	0.496017	0.489412	0.480738	0.487208
sub02	0.550425	0.541389	0.54472	0.556095	0.547689	0.535688	0.543692	0.550943	0.549811	0.525901	0.536514	0.532339	0.509474	0.512719	0.504698
sub03	0.552952	0.542897	0.543037	0.555667	0.557905	0.549575	0.528727	0.533807	0.527432	0.52	0.517991	0.52	0.502759	0.499957	0.50125
sub04	0.530682	0.540463	0.532248	0.540741	0.542037	0.515455	0.522188	0.523919	0.516327	0.498077	0.508728	0.497415	0.480492	0.481198	0.492161		0.531988	0.531958	0.532139
sub05	0.499402	0.485875	0.493856	0.506652	0.507018	0.493067	0.509649	0.513097	0.501121	0.495975	0.496239	0.491555	0.477459	0.47439	0.475854		0.514448	0.511012	0.507787
sub06	0.569706	0.555437	0.561602	0.563204	0.559279	0.562476	0.549764	0.536273	0.541698	0.522523	0.527883	0.527297	0.511974	0.520848	0.514115		0.557563	0.55327	0.550375
sub07	0.601495	0.601198	0.632935	0.599948	0.604574	0.601289	0.593418	0.599368	0.600309	0.570784	0.554333	0.548208	0.533028	0.55581	0.539213		0.607759	0.596599	0.614097
sub08	0.642444	0.6475	0.652865	0.630924	0.631141	0.634341	0.594949	0.594184	0.599175	0.565	0.571275	0.564078	0.514602	0.511228	0.509386		0.606379	0.607448	0.604286
sub09	0.660568	0.639121	0.647865	0.651742	0.629239	0.649551	0.611053	0.602732	0.599845	0.57805	0.570686	0.573861	0.536239	0.539352	0.538194		0.605103	0.603562	0.607222
sub10	0.745128	0.770667	0.729304	0.736646	0.71642	0.724873	0.648764	0.676163	0.637198	0.595722	0.611737	0.608526	0.58275	0.569657	0.600625		0.633777	0.627821	0.656007
sub11	0.55649	0.554952	0.563932	0.580099	0.542083	0.551667	0.548113	0.546729	0.541389	0.531927	0.533991	0.536376	0.530409	0.535833	0.527364		0.548106	0.549656	0.555812
sub12	0.645833	0.621183	0.628478	0.629333	0.631033	0.640389	0.614787	0.638956	0.623804	0.613053	0.589847	0.605625	0.588889	0.58235	0.577772		0.628857	0.625355	0.628921
sub13	0.680824	0.675765	0.659148	0.670407	0.670988	0.674419	0.64011	0.626141	0.640549	0.598814	0.599072	0.600928	0.568333	0.58125	0.5822		0.632554	0.633453	0.63587
sub14	0.577673	0.592041	0.5816	0.574851	0.585808	0.58165	0.562596	0.55851	0.567039	0.533091	0.540926	0.537361	0.513202	0.511842	0.510921		0.569097	0.566026	0.565481
sub15	0.685412	0.682118	0.688929	0.652303	0.658239	0.663448	0.62586	0.641444	0.641722	0.639505	0.615053	0.617979	0.606563	0.609053	0.58155		0.610243	0.623085	0.621418
sub16	0.620699	0.624946	0.611842	0.626774	0.602187	0.636374	0.601823	0.599175	0.567233	0.579109	0.596598	0.59602	0.568873	0.555429	0.569412		0.607862	0.599388	0.582517
sub17	0.605052	0.629837	0.590204	0.588485	0.628098	0.593571	0.57599	0.610053	0.605833	0.5804	0.5793	0.58335	0.556476	0.54257	0.531273		0.563806	0.592282	0.555
sub18	0.57698	0.554714	0.567059	0.57297	0.577157	0.557788	0.572136	0.553	0.559904	0.544626	0.557837	0.549245	0.534679	0.535596	0.532936		0.556994	0.550281	0.572143
sdv	uphill15_Sub	uphill15_No	uphill15_Supra	uphill8_Sub	uphill8_No	uphill8_Supra	level_Sub	level_No	level_Supra	downhill8_Sub	downhill8_No	downhill8_Supra	downhill15_Sub	downhill15_No	downhill15_Supra		Level_Sub (3 min)	Level_No (3 min)	Level_Supra (3 min)
sub01	0.0126363	0.00869167	0.00709518	0.0103325	0.00834386	0.00713347	0.00720977	0.00760552	0.00750639	0.00882451	0.0131909	0.00858557	0.0107899	0.0119532	0.0102987
sub02	0.0123599	0.0130557	0.0138976	0.0133863	0.010544	0.0103719	0.0119359	0.0103453	0.011634	0.0133402	0.0150855	0.0126725	0.013763	0.0144554	0.0149099
sub03	0.0138144	0.0182064	0.0127996	0.0199379	0.0160461	0.0137538	0.013499	0.0139875	0.0107053	0.013619	0.0125454	0.0132435	0.0158355	0.0143947	0.0137421
sub04	0.0113911	0.0115654	0.0108406	0.0102251	0.0116419	0.0108057	0.00832368	0.00919692	0.00836496	0.0129568	0.0134888	0.0142971	0.0147172	0.0149212	0.0130689		0.0100284	0.0108538	0.00955565
sub05	0.00975348	0.0118756	0.0109907	0.0106387	0.00930599	0.0109715	0.00949956	0.0100071	0.00984855	0.0128323	0.0111867	0.0112659	0.0113016	0.0121395	0.0118607		0.0101145	0.0107119	0.0108983
sub06	0.0170363	0.0124284	0.0141568	0.0110525	0.0134452	0.0144248	0.0102081	0.0107959	0.0093066	0.0125634	0.0115507	0.0104765	0.0114724	0.0120725	0.0112762		0.0110268	0.0102602	0.0101611
sub07	0.0262355	0.0217755	0.0276741	0.0214808	0.0231714	0.0215355	0.015154	0.0250026	0.0251951	0.0311391	0.0279611	0.0233049	0.0208663	0.0215583	0.0214108		0.0194758	0.0164784	0.0278179
sub08	0.0173218	0.0178264	0.0181183	0.0140987	0.0152763	0.013403	0.0109694	0.0104461	0.00996558	0.0114972	0.0125041	0.0120189	0.0163181	0.0148122	0.0132546		0.0107302	0.00986746	0.0132189
sub09	0.0222568	0.019701	0.023065	0.0190967	0.019983	0.0207426	0.0125906	0.0113431	0.0130273	0.0139722	0.015809	0.0138905	0.0183712	0.0167578	0.019493		0.014348	0.0130681	0.016951
sub10	0.0334045	0.0411677	0.0346838	0.0426032	0.0315209	0.0314649	0.0338497	0.0270817	0.0160481	0.0244108	0.0275406	0.0319162	0.0235772	0.021995	0.0346144		0.0236735	0.019224	0.0280625
sub11	0.0138441	0.013929	0.0109076	0.0172913	0.0122096	0.0123001	0.0100689	0.0101736	0.00985065	0.0133688	0.0135644	0.0128588	0.0146456	0.0144436	0.0151018		0.00846385	0.00960123	0.0096786
sub12	0.0186058	0.0147087	0.0166797	0.0177878	0.0195465	0.0187663	0.0122396	0.0105187	0.0114683	0.0144996	0.0154523	0.0123645	0.015146	0.0179251	0.0174643		0.0118788	0.0148858	0.0142793
sub13	0.0333349	0.032361	0.0261615	0.0271883	0.0260173	0.023923	0.0192013	0.0157252	0.020914	0.0236131	0.0281597	0.0250682	0.0242574	0.0246558	0.0274205		0.0182403	0.0205289	0.032165
sub14	0.0117032	0.0145368	0.0107238	0.0103584	0.0105701	0.00895129	0.00804823	0.00853319	0.00893014	0.0122461	0.0104034	0.010363	0.0117518	0.0104726	0.00943355		0.00748252	0.0085902	0.00949915
sub15	0.030714	0.0367042	0.0279823	0.0301347	0.0241802	0.0296532	0.0230479	0.0200315	0.0182638	0.0309224	0.0255481	0.0276124	0.0226909	0.0296961	0.0234913		0.0220176	0.0219643	0.0237581
sub16	0.0231575	0.0196722	0.0184439	0.0212084	0.0178301	0.0196301	0.0139417	0.0152935	0.0132982	0.0155877	0.0222408	0.0229056	0.0215747	0.0188193	0.0180886		0.0185147	0.0146724	0.0131446
sub17	0.0197885	0.0202303	0.0194078	0.0157459	0.0119658	0.0169631	0.012105	0.014753	0.0128084	0.0143611	0.0133504	0.0142557	0.0188646	0.015563	0.0212719		0.013497	0.0189637	0.0139712
sub18	0.0210755	0.0232629	0.0181228	0.0269911	0.0186886	0.0229217	0.0151237	0.0190635	0.0186928	0.0205343	0.0182774	0.0165414	0.0203783	0.0185886	0.020652		0.0181526	0.0172128	0.0257238
cv	uphill15_Sub	uphill15_No	uphill15_Supra	uphill8_Sub	uphill8_No	uphill8_Supra	level_Sub	level_No	level_Supra	downhill8_Sub	downhill8_No	downhill8_Supra	downhill15_Sub	downhill15_No	downhill15_Supra		Level_Sub (3 min)	Level_No (3 min)	Level_Supra (3 min)
sub01	2.53176	1.69891	1.38741	1.9903	1.60835	1.384	1.41367	1.50438	1.4637	1.77345	2.68625	1.73017	2.20297	2.48068	2.1146
sub02	2.24495	2.41138	2.55148	2.40724	1.92331	1.93619	2.19468	1.87614	2.11603	2.53943	2.81231	2.38243	2.70118	2.81961	2.95385
sub03	2.49912	3.3504	2.35656	3.58675	2.87696	2.50344	2.54794	2.6185	2.02856	2.61917	2.42177	2.54717	3.1491	2.87961	2.74084
sub04	2.14659	2.13839	2.03672	1.89177	2.14748	2.09635	1.59416	1.75509	1.61966	2.60166	2.65159	2.8756	3.06308	3.10096	2.65534		1.88517	2.04012	1.79555
sub05	1.95144	2.4449	2.22561	2.09846	1.83544	2.22477	1.86384	1.95033	1.96531	2.58681	2.25546	2.29157	2.36723	2.55868	2.49328		1.9664	2.09556	2.14629
sub06	2.98567	2.23758	2.52005	1.96165	2.40099	2.56538	1.85665	2.01367	1.71804	2.40455	2.18841	1.98602	2.24078	2.31778	2.19317		1.97762	1.85475	1.84677
sub07	4.35523	3.62085	4.35776	3.57923	3.83268	3.57886	2.55189	4.17149	4.19811	5.44608	5.04929	4.24882	3.91527	3.88308	3.96995		3.20381	2.75933	4.52621
sub08	2.69631	2.75393	2.77564	2.23592	2.41944	2.11322	1.84379	1.75806	1.66322	2.03435	2.18682	2.13226	3.16607	2.89121	2.60139		1.76976	1.62312	2.18252
sub09	3.36852	3.08234	3.55951	2.92995	3.17468	3.19172	2.06001	1.87948	2.17086	2.41796	2.7712	2.42074	3.42584	3.11161	3.61906		2.37136	2.16549	2.79156
sub10	4.48282	5.3362	4.75431	5.78468	4.4008	4.34061	5.23151	4.00671	2.51871	4.09828	4.50104	5.24135	4.04654	3.86122	5.76342		3.73606	3.06323	4.27807
sub11	2.49425	2.51108	1.93524	2.98075	2.25929	2.23165	1.83736	1.8602	1.82169	2.51506	2.54109	2.39807	2.76221	2.69559	2.86319		1.54484	1.74634	1.74134
sub12	2.88196	2.36447	2.65414	2.82645	3.09725	2.92893	1.98847	1.64684	1.83844	2.36435	2.62053	2.0418	2.57335	3.07919	3.02262		1.88854	2.38142	2.27045
sub13	4.89729	4.78755	3.97295	4.0576	3.87739	3.53473	2.997	2.51233	3.2684	3.93837	4.69313	4.17374	4.26986	4.24042	4.72008		2.88231	3.24072	5.08669
sub14	2.02403	2.45538	1.8432	1.80296	1.80374	1.5382	1.42982	1.5272	1.5741	2.29617	1.92337	1.92834	2.28975	2.04619	1.84615		1.31526	1.51786	1.68136
sub15	4.48185	5.39237	4.06374	4.61971	3.67347	4.46991	3.68249	3.12287	2.84439	4.83459	4.15471	4.4691	3.74061	4.87522	4.03412		3.60913	3.52846	3.8243
sub16	3.72957	3.14813	3.01642	3.38075	2.96094	3.08126	2.32386	2.55761	2.34134	2.69324	3.72802	3.84723	3.79216	3.38994	3.17444		3.04393	2.44032	2.25803
sub17	3.27078	3.21065	3.28915	2.67457	1.90768	2.86148	2.10173	2.42063	2.11022	2.47516	2.30394	2.44334	3.3919	2.86841	4.00245		2.06777	3.20181	2.51688
sub18	3.65429	4.19773	3.199	4.71435	3.23804	4.10916	2.64338	3.44762	3.33749	3.7653	3.27712	3.00902	3.8109	3.47053	3.88115		2.39391	3.1317	4.50108

## Sheet: stride time
avg	uphill15_Sub	uphill15_No	uphill15_Supra	uphill8_Sub	uphill8_No	uphill8_Supra	level_Sub	level_No	level_Supra	downhill8_Sub	downhill8_No	downhill8_Supra	downhill15_Sub	downhill15_No	downhill15_Supra		Level_Sub (3 min)	Level_No (3 min)	Level_Supra (3 min)
sub01	0.998162	1.02272	1.02281	1.03781	1.03804	1.03115	1.01991	1.0094	1.02636	0.995	0.982017	0.992076	0.978992	0.961885	0.974417
sub02	1.1008	1.08273	1.08953	1.11229	1.09552	1.07151	1.08752	1.10203	1.09972	1.05198	1.07312	1.06472	1.01908	1.02561	1.00935
sub03	1.10605	1.08575	1.08612	1.11162	1.11595	1.0992	1.05755	1.06752	1.05486	1.04004	1.03589	1.04018	1.00573	0.999786	1.00259
sub04	1.06145	1.08106	1.06454	1.08139	1.08417	1.05364	1.04438	1.04779	1.0327	0.996197	1.01759	0.994958	0.960902	0.962438	0.984322		1.06401	1.06401	1.06437
sub05	0.998761	0.97175	0.987627	1.01326	1.02136	0.986218	1.0193	1.02832	1.00539	0.991992	0.992521	0.982983	0.954877	0.94878	0.951667		1.02892	1.02205	1.0156
sub06	1.13936	1.12757	1.1232	1.12646	1.11865	1.12515	1.09962	1.07264	1.0942	1.04514	1.05581	1.05468	1.02395	1.04179	1.02827		1.11516	1.10657	1.10078
sub07	1.20289	1.20193	1.26549	1.20005	1.23324	1.20258	1.18684	1.21484	1.20057	1.14186	1.10843	1.09651	1.06615	1.11195	1.07847		1.21538	1.19323	1.22826
sub08	1.28489	1.29511	1.30567	1.26217	1.26228	1.26874	1.19005	1.1827	1.19036	1.1301	1.1426	1.12816	1.02907	1.02241	1.01877		1.21286	1.21493	1.20974
sub09	1.32085	1.27824	1.29551	1.30371	1.25832	1.29921	1.22211	1.20536	1.19969	1.15595	1.14137	1.14767	1.07261	1.0788	1.07648		1.21017	1.20702	1.22073
sub10	1.48987	1.54207	1.45835	1.4731	1.43302	1.44975	1.29747	1.35221	1.27473	1.19129	1.22332	1.217	1.1654	1.13931	1.20104		1.26741	1.25561	1.31179
sub11	1.11298	1.10976	1.12791	1.14446	1.08412	1.10333	1.09632	1.09332	1.08273	1.06394	1.06803	1.07294	1.06073	1.07157	1.05464		1.09624	1.09928	1.10203
sub12	1.29194	1.24247	1.2569	1.28733	1.26212	1.28078	1.22957	1.27797	1.26457	1.22626	1.1798	1.2112	1.17778	1.1646	1.1554		1.25771	1.25071	1.26899
sub13	1.36188	1.35194	1.31812	1.34087	1.34198	1.34878	1.28033	1.25255	1.28104	1.19773	1.1982	1.2018	1.13667	1.16245	1.16465		1.26522	1.26698	1.27174
sub14	1.15545	1.18413	1.1634	1.1496	1.17162	1.16335	1.1251	1.11707	1.13403	1.06636	1.08176	1.07481	1.02632	1.0236	1.02184		1.13819	1.13202	1.13106
sub15	1.37106	1.36429	1.3775	1.30444	1.31648	1.3273	1.25156	1.28878	1.28328	1.27907	1.23011	1.23569	1.21328	1.21837	1.16305		1.22045	1.24613	1.24287
sub16	1.24156	1.24989	1.22368	1.25371	1.20458	1.27269	1.2038	1.19845	1.13456	1.15822	1.1933	1.19224	1.13789	1.111	1.13882		1.2159	1.19871	1.1651
sub17	1.21021	1.25967	1.1802	1.17712	1.2562	1.18724	1.15198	1.22021	1.21161	1.16075	1.15855	1.16675	1.1129	1.08523	1.0625		1.13519	1.17852	1.11
sub18	1.15381	1.10962	1.13412	1.14574	1.13863	1.11543	1.12646	1.1061	1.11976	1.08935	1.11563	1.09854	1.06917	1.07115	1.06555		1.11418	1.10044	1.14442
sdv	uphill15_Sub	uphill15_No	uphill15_Supra	uphill8_Sub	uphill8_No	uphill8_Supra	level_Sub	level_No	level_Supra	downhill8_Sub	downhill8_No	downhill8_Supra	downhill15_Sub	downhill15_No	downhill15_Supra		Level_Sub (3 min)	Level_No (3 min)	Level_Supra (3 min)
sub01	0.0217255	0.0133213	0.0100441	0.0167938	0.011986	0.00979046	0.0097738	0.0108139	0.00946934	0.0129689	0.0214735	0.0114056	0.0149204	0.0173447	0.0138895
sub02	0.0175025	0.0194899	0.0219013	0.0190503	0.0158275	0.01584	0.0204171	0.0159727	0.018995	0.0192732	0.0200774	0.0148461	0.01641	0.017232	0.0183685
sub03	0.0220585	0.0288317	0.0179197	0.0318964	0.024992	0.0195281	0.0179513	0.0190578	0.0152399	0.0176924	0.0152088	0.0173768	0.0199467	0.0176267	0.0154138
sub04	0.0170443	0.0162006	0.0159254	0.0145623	0.0179354	0.0136617	0.0114038	0.0129281	0.0113959	0.0174086	0.0191431	0.018312	0.0187578	0.0203954	0.0174043		0.0150915	0.017268	0.0139518
sub05	0.0131641	0.0166997	0.0157776	0.0142964	0.0131056	0.0148685	0.012875	0.0144174	0.0146951	0.0156413	0.014286	0.013588	0.0137086	0.0142611	0.0130533		0.013792	0.0159273	0.0155972
sub06	0.029078	0.0206144	0.0216322	0.0166733	0.0219387	0.0251372	0.0153565	0.0157767	0.0119049	0.0164788	0.0165047	0.0138034	0.0133776	0.014635	0.0137622		0.0182247	0.0155246	0.0155511
sub07	0.0453431	0.0333494	0.0485416	0.0344207	0.0450664	0.034574	0.0229751	0.0416126	0.0442666	0.0457682	0.0354525	0.032588	0.0261431	0.0278615	0.0303368		0.0312535	0.02494	0.0468001
sub08	0.0220835	0.0234	0.0265612	0.0222506	0.0197483	0.0183458	0.0169519	0.0138588	0.014626	0.0143127	0.0166241	0.0144326	0.0211128	0.0191608	0.0151144		0.0153288	0.0142627	0.0170372
sub09	0.0362828	0.0292912	0.0384054	0.0290022	0.031306	0.0323072	0.0163008	0.0155769	0.018478	0.0179432	0.0202479	0.0162764	0.0245789	0.0217524	0.0283596		0.0215973	0.0196414	0.0256723
sub10	0.0560901	0.072622	0.0571117	0.0781245	0.0548932	0.0501571	0.061364	0.0451764	0.0251339	0.036743	0.0378928	0.0489944	0.03309	0.0296377	0.0484095		0.0386312	0.028729	0.046872
sub11	0.019502	0.0206441	0.0170065	0.0318864	0.018167	0.01869	0.0145926	0.0129043	0.0137007	0.0176888	0.0159879	0.0164225	0.0188518	0.0176172	0.0198668		0.011693	0.0134273	0.0127818
sub12	0.0295831	0.0215198	0.0248437	0.0277314	0.034611	0.0299823	0.017439	0.0146867	0.0160103	0.0184433	0.0192289	0.0159241	0.019742	0.0253944	0.0223387		0.0164324	0.0236459	0.0205083
sub13	0.0574209	0.0562695	0.0432363	0.0433658	0.0423575	0.0390129	0.0322317	0.0238875	0.0322744	0.0306671	0.0408979	0.0403748	0.0350318	0.0327574	0.0431793		0.0289446	0.034493	0.0507539
sub14	0.0179712	0.0211218	0.0149793	0.0149943	0.0155291	0.0124793	0.0102809	0.0109811	0.0100722	0.0164902	0.0135449	0.0138599	0.0151873	0.0131607	0.0123705		0.00897109	0.0118628	0.0136413
sub15	0.0519776	0.0665452	0.047575	0.0513225	0.0395592	0.0520354	0.0353185	0.0365374	0.029192	0.0461721	0.0344558	0.0360841	0.0282758	0.0461168	0.033197		0.0369176	0.0378355	0.0368671
sub16	0.0391654	0.0300064	0.0289619	0.0339937	0.029176	0.030117	0.0217279	0.0235186	0.0199055	0.0225105	0.0324086	0.036507	0.0287291	0.026081	0.0235802		0.0319399	0.0231801	0.0191741
sub17	0.0318471	0.0319638	0.0316427	0.0241205	0.0168405	0.0272792	0.0173216	0.0232164	0.0197604	0.0187429	0.0187257	0.021716	0.0288114	0.0191735	0.0295316		0.021827	0.0326041	0.0217572
sub18	0.026018	0.0342241	0.0267682	0.0442844	0.0269387	0.0368638	0.0233363	0.030063	0.0274478	0.0285601	0.0198349	0.0208648	0.0269467	0.0237828	0.025649		0.0293571	0.0259101	0.0454386
cv	uphill15_Sub	uphill15_No	uphill15_Supra	uphill8_Sub	uphill8_No	uphill8_Supra	level_Sub	level_No	level_Supra	downhill8_Sub	downhill8_No	downhill8_Supra	downhill15_Sub	downhill15_No	downhill15_Supra		Level_Sub (3 min)	Level_No (3 min)	Level_Supra (3 min)
sub01	2.17655	1.30253	0.982009	1.61819	1.15467	0.949469	0.9583	1.07132	0.922615	1.30341	2.18667	1.14966	1.52405	1.80324	1.42542
sub02	1.58998	1.80006	2.01015	1.71272	1.44475	1.47828	1.87739	1.44938	1.72726	1.83209	1.87094	1.39436	1.61029	1.68014	1.81983
sub03	1.99435	2.65547	1.64988	2.8694	2.23954	1.77658	1.69745	1.78524	1.44472	1.70112	1.46819	1.67055	1.98328	1.76305	1.5374
sub04	1.60575	1.49858	1.49598	1.34663	1.6543	1.29662	1.09193	1.23385	1.10351	1.7475	1.88121	1.84048	1.9521	2.11914	1.76815		1.41836	1.62293	1.31081
sub05	1.31805	1.71852	1.59753	1.41093	1.28315	1.50762	1.26313	1.40203	1.46163	1.57676	1.43937	1.38233	1.43564	1.50309	1.37163		1.34043	1.55837	1.53576
sub06	2.55213	1.82821	1.92593	1.48016	1.96117	2.23414	1.39653	1.47084	1.08801	1.57673	1.56323	1.30877	1.30648	1.40481	1.33838		1.63427	1.40294	1.41274
sub07	3.76952	2.77462	3.83577	2.86827	3.65428	2.87499	1.93582	3.42535	3.68714	4.00819	3.19843	2.97197	2.4521	2.50564	2.81294		2.57151	2.09012	3.81027
sub08	1.71871	1.8068	2.03429	1.76287	1.56449	1.44599	1.42446	1.17179	1.2287	1.2665	1.45494	1.27931	2.05165	1.87408	1.48359		1.26385	1.17395	1.40852
sub09	2.74691	2.29153	2.96451	2.22457	2.48793	2.48668	1.33383	1.2923	1.54023	1.55224	1.774	1.41821	2.29149	2.01637	2.63447		1.78465	1.62726	2.10303
sub10	3.7647	4.70935	3.91615	5.30342	3.83061	3.45971	4.72951	3.34093	1.97167	3.0843	3.09754	4.02583	2.83937	2.60136	4.03065		3.04803	2.28806	3.57312
sub11	1.75223	1.86024	1.50778	2.78616	1.67574	1.69396	1.33105	1.18029	1.26539	1.66257	1.49696	1.5306	1.77726	1.64406	1.88376		1.06665	1.22147	1.15984
sub12	2.28981	1.73202	1.97658	2.15417	2.74229	2.34094	1.41829	1.14922	1.26607	1.50403	1.62984	1.31474	1.67621	2.18052	1.93343		1.30653	1.8906	1.61611
sub13	4.2163	4.16214	3.28014	3.23415	3.15635	2.89247	2.51744	1.90711	2.51939	2.56042	3.4133	3.35951	3.08198	2.81796	3.70749		2.28771	2.72246	3.9909
sub14	1.55534	1.78374	1.28755	1.3043	1.32544	1.0727	0.913782	0.983031	0.88818	1.5464	1.25212	1.28951	1.4798	1.28572	1.21061		0.788187	1.04794	1.20607
sub15	3.79109	4.87763	3.45373	3.93446	3.00493	3.92041	2.82197	2.83505	2.27479	3.60983	2.80105	2.92011	2.3305	3.7851	2.8543		3.02491	3.03623	2.96628
sub16	3.15453	2.40071	2.36678	2.71144	2.42208	2.3664	1.80494	1.96242	1.75446	1.94354	2.71589	3.06202	2.52475	2.34752	2.07058		2.62686	1.93376	1.6457
sub17	2.63153	2.53746	2.68111	2.04909	1.3406	2.2977	1.50363	1.90266	1.63091	1.61472	1.6163	1.86124	2.58884	1.76677	2.77944		1.92275	2.76654	1.96011
sub18	2.25495	3.0843	2.36027	3.86514	2.36589	3.30489	2.07166	2.71794	2.45122	2.62176	1.77791	1.89933	2.52033	2.22032	2.40709		2.63486	2.35452	3.97046

## Sheet: double support time
avg	uphill15_Sub	uphill15_No	uphill15_Supra	uphill8_Sub	uphill8_No	uphill8_Supra	level_Sub	level_No	level_Supra	downhill8_Sub	downhill8_No	downhill8_Supra	downhill15_Sub	downhill15_No	downhill15_Supra		Level_Sub (3 min)	Level_No (3 min)	Level_Supra (3 min)
sub01	0.107308	0.111842	0.112105	0.108214	0.108482	0.108363	0.102851	0.16875	0.104035	0.161923	0.158571	0.161864	0.148824	0.145492	0.148958
sub02	0.120425	0.118102	0.117196	0.119143	0.117217	0.111376	0.111729	0.115094	0.115236	0.170676	0.175367	0.177477	0.160921	0.163904	0.16319
sub03	0.115286	0.110561	0.116963	0.11481	0.120429	0.116368	0.1095	0.117798	0.111216	0.179286	0.181786	0.17933	0.169526	0.164573	0.169698
sub04	0.11	0.110972	0.112385	0.115972	0.117731	0.118727	0.105804	0.104459	0.10469	0.168632	0.182018	0.17572	0.158443	0.157107	0.168898		0.108404	0.109367	0.109789
sub05	0.0925641	0.0928333	0.0960593	0.092	0.0952632	0.0887395	0.0964912	0.0972566	0.0965517	0.152458	0.156154	0.153782	0.140697	0.136911	0.139675		0.0967442	0.0948555	0.0930172
sub06	0.126127	0.130291	0.128981	0.128689	0.122933	0.12835	0.122311	0.120318	0.122925	0.185	0.186351	0.185045	0.174474	0.179866	0.175575		0.126614	0.126132	0.125938
sub07	0.155412	0.149427	0.168533	0.159691	0.167128	0.161753	0.161327	0.172421	0.168196	0.236569	0.228667	0.230896	0.210642	0.221238	0.212778		0.173414	0.161973	0.175903
sub08	0.164611	0.168444	0.170169	0.151685	0.155598	0.151813	0.134847	0.130816	0.13268	0.210194	0.212794	0.210437	0.184735	0.185702	0.184035		0.141276	0.141931	0.142143
sub09	0.152443	0.144066	0.141798	0.149213	0.139402	0.145112	0.139053	0.133093	0.136082	0.21115	0.211373	0.210594	0.182615	0.181898	0.182222		0.137397	0.13911	0.144722
sub10	0.187949	0.188733	0.187848	0.19019	0.175802	0.189304	0.169831	0.173081	0.163077	0.245928	0.251211	0.251211	0.2447	0.246029	0.251458		0.163741	0.15975	0.174963
sub11	0.120721	0.116571	0.124272	0.11901	0.111343	0.11581	0.127547	0.122103	0.124676	0.212431	0.214862	0.216743	0.202364	0.203889	0.201364		0.125994	0.124219	0.126062
sub12	0.149056	0.148602	0.149239	0.160778	0.153424	0.151944	0.142553	0.143791	1.25793	0.217158	0.219337	0.224531	0.209141	0.2091	0.207624		0.149286	0.146135	0.149065
sub13	0.173647	0.179529	0.181477	0.165698	0.164419	0.167674	0.151868	0.138043	0.143681	0.216649	0.205773	0.213866	0.189412	0.19725	0.195		0.149029	0.149496	0.148804
sub14	0.130594	0.134694	0.12985	0.125891	0.138081	0.1345	0.113702	0.113365	0.115777	0.181182	0.187037	0.186898	0.17	0.171623	0.168553		0.116677	0.115801	0.113526
sub15	0.188118	0.186529	0.192262	0.171236	0.172955	0.178103	0.166398	0.168	0.169444	0.265714	0.265211	0.266117	0.260573	0.264	0.24805		0.158924	0.162128	0.167021
sub16	0.15543	0.158118	0.151158	0.156075	0.146094	0.156593	0.144323	0.134124	0.134223	0.220545	0.222732	0.222143	0.206176	0.203095	0.208873		0.142483	0.142959	0.135795
sub17	0.153021	0.162717	0.155459	0.151212	0.157174	0.151531	0.14104	0.151316	0.149896	0.2124	0.2179	0.21555	0.20381	0.206402	0.197136		0.145548	0.148054	0.135283
sub18	0.129901	0.124714	0.132255	0.140644	0.13098	0.126587	0.139612	0.136571	0.138269	0.205981	0.216683	0.213443	0.197798	0.198394	0.199266		0.135886	0.133375	0.147273
sdv	uphill15_Sub	uphill15_No	uphill15_Supra	uphill8_Sub	uphill8_No	uphill8_Supra	level_Sub	level_No	level_Supra	downhill8_Sub	downhill8_No	downhill8_Supra	downhill15_Sub	downhill15_No	downhill15_Supra		Level_Sub (3 min)	Level_No (3 min)	Level_Supra (3 min)
sub01	0.00772423	0.00709663	0.00646251	0.00755714	0.00713808	0.00617308	0.00610887	0.0057153	0.00664342	0.00768699	0.00794279	0.00620248	0.00858237	0.00810738	0.00900977
sub02	0.00854457	0.00869334	0.00903835	0.00888338	0.00768381	0.00774556	0.00793886	0.00759225	0.00791942	0.00904081	0.0110565	0.0095279	0.0106282	0.0107243	0.0116393
sub03	0.00880748	0.0113166	0.0089592	0.0145092	0.0131037	0.0108669	0.0116537	0.0134273	0.00861409	0.0126573	0.0128629	0.0127966	0.0153986	0.0125208	0.0131334
sub04	0.0078041	0.00900515	0.00869922	0.00843137	0.00881124	0.00779427	0.00744946	0.00707382	0.00740985	0.00955077	0.00973031	0.0103416	0.0118409	0.0106627	0.0103101		0.0079147	0.00739199	0.00754474
sub05	0.0078952	0.0108447	0.0101326	0.00904673	0.00970453	0.0100639	0.00847902	0.00984231	0.00781342	0.00905003	0.00912418	0.00933737	0.00985783	0.0105766	0.0100229		0.00794499	0.00804969	0.00790785
sub06	0.0111062	0.00901592	0.0109143	0.00980583	0.00903582	0.00936827	0.00808931	0.00705803	0.00755513	0.0103232	0.00929496	0.00875863	0.00954525	0.0104799	0.0102496		0.00793802	0.00801583	0.00753406
sub07	0.0186555	0.0176321	0.0173503	0.0202986	0.0236744	0.0177009	0.0142434	0.020038	0.00952141	0.023648	0.0227313	0.0211127	0.0205353	0.0199022	0.0174435		0.0155761	0.0159206	0.0210035
sub08	0.0121767	0.0102686	0.0112447	0.00931819	0.0109907	0.00971291	0.00825625	0.00755372	0.0134309	0.0094512	0.0109539	0.0099132	0.0119035	0.0119126	0.0108301		0.00825536	0.00840792	0.0171729
sub09	0.0120862	0.0122174	0.0126892	0.0140893	0.0106585	0.0140782	0.00992913	0.00888804	0.0103639	0.0104712	0.0122708	0.00992391	0.0128014	0.0125399	0.0132836		0.0114316	0.0110409	0.0125126
sub10	0.0193158	0.022234	0.0218682	0.0237538	0.0196475	0.0223375	0.0216884	0.0188681	0.0144502	0.0177859	0.0184861	0.0203039	0.0195372	0.0189661	0.0244436		0.0172769	0.0157025	0.0196555
sub11	0.0115521	0.0104904	0.00996784	0.0149335	0.00988957	0.00901277	0.00860505	0.00776453	0.00795766	0.0111637	0.0114587	0.0102768	0.0128223	0.0121256	0.0136311		0.00724613	0.00806984	0.00840013
sub12	0.0127408	0.0104712	0.0141603	0.0117299	0.0104764	0.0115028	0.00971546	0.0095376	0.0163841	0.0119287	0.0128576	0.01178	0.0143589	0.0141573	0.014879		0.00956935	0.010305	0.0108942
sub13	0.0185108	0.0163231	0.0184166	0.0176606	0.0155091	0.0154466	0.0129434	0.0144678	0.0135684	0.0163611	0.0146374	0.0139575	0.0165302	0.0160135	0.0160555		0.0136156	0.013233	0.0152957
sub14	0.00908473	0.0102553	0.00820832	0.00812354	0.00876877	0.00833333	0.00721973	0.00725416	0.00720982	0.0094008	0.00953824	0.00981694	0.0118811	0.011171	0.010007		0.006665	0.0072906	0.00757073
sub15	0.0190819	0.0196329	0.0180415	0.0198718	0.0153996	0.0192626	0.017206	0.0146264	0.0130085	0.0196893	0.0189607	0.0209455	0.0208034	0.0219677	0.0183412		0.0152472	0.0146984	0.0169767
sub16	0.0141558	0.0149088	0.0123523	0.0134995	0.0131401	0.0131835	0.0104037	0.0116147	0.00912629	0.00998341	0.0137702	0.0128023	0.014805	0.0128275	0.0124605		0.0121195	0.0100175	0.00969302
sub17	0.0136293	0.0131842	0.0127409	0.0117626	0.0111604	0.0100875	0.0106193	0.0111564	0.00983286	0.0123495	0.0105978	0.0110316	0.0136518	0.012689	0.0150228		0.0114609	0.0132888	0.0111348
sub18	0.0145584	0.0125505	0.0121061	0.0172899	0.0132388	0.0141076	0.0135706	0.0141301	0.0133914	0.0157267	0.0155243	0.0147034	0.0160551	0.015925	0.0192391		0.0136838	0.0125446	0.0164909
cv	uphill15_Sub	uphill15_No	uphill15_Supra	uphill8_Sub	uphill8_No	uphill8_Supra	level_Sub	level_No	level_Supra	downhill8_Sub	downhill8_No	downhill8_Supra	downhill15_Sub	downhill15_No	downhill15_Supra		Level_Sub (3 min)	Level_No (3 min)	Level_Supra (3 min)
sub01	7.16845	6.34451	5.77309	7.01996	6.5716	5.69714	5.93331	3.38656	6.39361	4.74715	5.01081	3.83194	5.76247	5.58221	6.04898
sub02	7.10554	7.38538	7.69601	7.45917	6.52198	6.94765	7.09022	6.59236	6.87693	5.32194	6.31704	5.37199	6.61705	6.54073	7.13284
sub03	7.65281	10.1883	7.6609	12.5796	10.8975	9.32056	10.586	11.3986	7.74042	7.04598	7.07401	7.13282	9.08186	7.60428	7.73867
sub04	7.08746	8.12512	7.74606	7.2733	7.4816	6.56485	7.04022	6.7718	7.07964	5.66366	5.34697	5.88561	7.46865	6.78597	6.1078		7.30152	6.75956	6.86374
sub05	8.52944	11.6967	10.5481	9.82665	10.1871	11.3463	8.79425	10.1199	8.09247	5.93124	5.84609	6.06736	7.00793	7.72695	7.17284		8.22197	8.49784	8.49839
sub06	8.84237	6.91982	8.4594	7.62551	7.33946	7.29267	6.61351	5.86643	6.14615	5.57498	4.98797	4.73805	5.46456	5.8244	5.83899		6.27208	6.35924	5.98097
sub07	11.9892	11.7751	10.3003	12.6867	14.1655	10.9244	8.8125	11.6216	7.1762	9.97076	9.95056	9.14238	9.76149	9.00322	8.19792		8.97624	9.83669	11.9433
sub08	7.40758	6.09068	6.606	6.16387	7.053	6.40992	6.13844	5.7743	4.23908	4.49543	5.14764	4.71731	6.4294	6.40661	5.89782		5.84159	5.91192	12.2662
sub09	7.92807	8.47231	8.93941	9.43463	7.65083	9.70259	7.12975	6.66506	7.61587	4.95928	5.8053	4.72106	7.02832	6.93686	7.27296		8.31263	7.92692	8.64596
sub10	10.3082	11.8121	11.6296	12.5283	11.1711	11.8005	12.841	10.8985	8.85307	7.25195	7.36547	8.09661	7.99667	7.71323	9.74063		10.5318	9.82517	11.1931
sub11	9.68006	9.06292	8.05753	12.5481	8.98727	7.84961	6.77102	6.36502	6.4267	5.25987	5.34216	4.75453	6.34076	5.94757	6.77314		5.75745	6.50697	6.66346
sub12	8.55114	7.01923	9.48832	7.29572	6.82412	7.5797	6.79212	6.66663	1.30499	5.49583	5.86137	5.2502	6.85833	6.76568	7.16776		6.41009	7.03829	7.30839
sub13	10.6422	9.09214	10.1482	10.6686	9.40463	9.10055	8.51962	10.4806	9.44655	7.55856	7.1231	6.54181	8.72933	8.12143	8.25103		9.12414	8.83744	10.3258
sub14	6.93488	7.62849	6.31993	6.47713	6.35046	6.19579	6.34619	6.40784	6.27826	5.19057	5.09947	5.26183	6.99076	6.50831	5.93356		5.74208	6.31115	6.70225
sub15	10.138	10.5777	9.38224	11.6049	8.90384	10.8158	10.3404	8.70621	7.6737	7.41299	7.15036	7.88649	7.97989	8.3197	7.3835		9.59951	9.09044	10.1644
sub16	9.10652	9.42756	8.16733	8.64446	8.9812	8.41666	7.21487	8.65969	6.79087	4.54734	6.19108	5.80633	7.19507	6.3433	5.9683		8.50956	7.01345	7.12948
sub17	8.90914	8.09106	8.17174	7.76894	7.12376	6.65704	7.52785	7.37482	6.5629	5.81228	4.86194	5.11205	6.69737	6.14667	7.6206		7.87432	8.97565	8.2321
sub18	11.2128	10.0709	9.14941	12.2805	10.1075	11.155	9.72026	10.3464	9.68043	7.63655	7.16505	6.88548	8.11563	8.04738	9.65942		10.0684	9.40987	11.1893

## Sheet: stance time_percent
avg	uphill15_Sub	uphill15_No	uphill15_Supra	uphill8_Sub	uphill8_No	uphill8_Supra	level_Sub	level_No	level_Supra	downhill8_Sub	downhill8_No	downhill8_Supra	downhill15_Sub	downhill15_No	downhill15_Supra		Level_Sub (3 min)	Level_No (3 min)	Level_Supra (3 min)
sub01	0.607418	0.609343	0.609601	0.604275	0.604456	0.605083	0.600791	0.667135	0.601335	0.337209	0.338428	0.336821	0.3479	0.348508	0.347145
sub02	0.609407	0.60907	0.607478	0.607048	0.606919	0.603852	0.602641	0.604355	0.604709	0.337705	0.336595	0.333312	0.342059	0.340133	0.338391
sub03	0.604134	0.601775	0.60763	0.602978	0.607753	0.605785	0.603428	0.602137	0.605398	0.327654	0.324596	0.32756	0.331404	0.335498	0.33072
sub04	0.603603	0.602556	0.605565	0.607282	0.608561	0.609354	0.601294	0.599717	0.601342	0.332408	0.32105	0.323301	0.335151	0.336739	0.328394		0.601847	0.602733	0.603097
sub05	0.597129	0.595469	0.597253	0.590776	0.586172	0.589892	0.59463	0.589723	0.590801	0.346303	0.34267	0.34364	0.352692	0.355721	0.353276		0.59398	0.592757	0.591549
sub06	0.610656	0.614262	0.614825	0.614193	0.609827	0.613943	0.611171	0.612133	0.616089	0.322964	0.323496	0.324518	0.329607	0.327333	0.329247		0.613518	0.613966	0.614388
sub07	0.629143	0.624458	0.633271	0.632909	0.629092	0.634416	0.635873	0.6407	0.639912	0.292862	0.293903	0.289519	0.302444	0.300962	0.302749		0.64266	0.635644	0.642997
sub08	0.628103	0.630032	0.630336	0.620042	0.623241	0.619615	0.613213	0.615916	0.615514	0.313967	0.313752	0.313481	0.320557	0.31842	0.319357		0.61642	0.616784	0.617032
sub09	0.615509	0.612666	0.609453	0.614301	0.61084	0.611579	0.613758	0.610436	0.607007	0.317407	0.311657	0.316534	0.32971	0.33135	0.330662		0.613482	0.61524	0.611677
sub10	0.626212	0.622092	0.6288	0.628977	0.622545	0.630495	0.630669	0.627915	0.627742	0.293642	0.294755	0.29356	0.290103	0.284074	0.290818		0.629132	0.627147	0.633336
sub11	0.608428	0.605078	0.610137	0.612819	0.602694	0.604912	0.616265	0.611723	0.61514	0.300308	0.298826	0.297921	0.309318	0.309808	0.30917		0.614902	0.612988	0.615
sub12	0.615236	0.619542	0.614049	0.625952	0.621506	0.618588	0.615909	0.612487	0.615151	0.322877	0.314076	0.314663	0.322468	0.32054	0.320402		0.613793	0.616814	0.618636
sub13	0.627308	0.627568	0.625238	0.623473	0.622435	0.624256	0.618506	0.612219	0.612123	0.319114	0.328228	0.322075	0.333389	0.33038	0.332397		0.617665	0.617906	0.616904
sub14	0.612957	0.613698	0.611507	0.609522	0.612884	0.609844	0.601088	0.601448	0.602109	0.33003	0.327158	0.326094	0.334448	0.332415	0.335078		0.6025	0.602293	0.600309
sub15	0.636992	0.63652	0.639578	0.631159	0.631219	0.633854	0.632927	0.628063	0.632052	0.292254	0.284434	0.284835	0.285236	0.283297	0.28681		0.630117	0.629992	0.630907
sub16	0.62506	0.626429	0.623469	0.624352	0.621107	0.622995	0.619791	0.626484	0.61822	0.309583	0.313345	0.313587	0.318814	0.317167	0.316622		0.617051	0.619238	0.616493
sub17	0.626341	0.629121	0.631769	0.628355	0.625099	0.624065	0.622413	0.623929	0.623724	0.317038	0.311939	0.315226	0.316946	0.309797	0.314561		0.626796	0.621711	0.621857
sub18	0.612596	0.612281	0.616588	0.622689	0.612094	0.613477	0.615228	0.623325	0.623412	0.310893	0.305822	0.305709	0.315145	0.314848	0.313243		0.621776	0.621207	0.628396
sdv	uphill15_Sub	uphill15_No	uphill15_Supra	uphill8_Sub	uphill8_No	uphill8_Supra	level_Sub	level_No	level_Supra	downhill8_Sub	downhill8_No	downhill8_Supra	downhill15_Sub	downhill15_No	downhill15_Supra		Level_Sub (3 min)	Level_No (3 min)	Level_Supra (3 min)
sub01	0.00667233	0.00635582	0.00589303	0.00590635	0.00523011	0.00485769	0.00525933	0.00505376	0.00540673	0.00575292	0.00601755	0.00486346	0.00628942	0.00749545	0.00591098
sub02	0.00723322	0.00817333	0.00843075	0.0069838	0.00624443	0.00641447	0.00594194	0.0062742	0.00613655	0.00674163	0.00859927	0.00600982	0.00758383	0.00741479	0.00783388
sub03	0.00724667	0.0109328	0.00905576	0.0106068	0.00880711	0.00797459	0.00668725	0.00805226	0.00634523	0.00773383	0.00762718	0.00776606	0.00937144	0.0077206	0.00817278
sub04	0.00726346	0.00739953	0.00721427	0.00680514	0.0070736	0.00689873	0.00642687	0.00609855	0.00651323	0.00684103	0.00786681	0.00891176	0.0101562	0.00913504	0.00943089		0.00624464	0.00611591	0.00616335
sub05	0.0069997	0.00920857	0.00750686	0.00705905	0.00834638	0.00813254	0.00688317	0.00787897	0.00759621	0.00736451	0.00668489	0.00751313	0.00811831	0.00825486	0.0085364		0.00617528	0.00702231	0.00660857
sub06	0.00833881	0.00731839	0.00915702	0.00691288	0.00660527	0.00670945	0.00589386	0.00621038	0.0054497	0.00668633	0.00662703	0.0064792	0.00752502	0.00715517	0.00698969		0.00587499	0.00607744	0.00551519
sub07	0.0146772	0.0130149	0.012915	0.0130462	0.0138654	0.0132931	0.00890085	0.0113572	0.0120883	0.0119735	0.00998764	0.0109307	0.0118994	0.0108559	0.00902542		0.00843825	0.00960892	0.0111598
sub08	0.00929121	0.0107058	0.00878161	0.00785759	0.00835641	0.00709755	0.00518702	0.00516852	0.00636002	0.00652615	0.0060745	0.00670225	0.00988858	0.00974373	0.00826837		0.0052504	0.00521612	0.00787706
sub09	0.00975185	0.00967829	0.00916294	0.00808862	0.00830668	0.00888735	0.00593497	0.00613543	0.00624852	0.0072878	0.00793795	0.00772057	0.00890652	0.00915696	0.0112535		0.00752937	0.00696752	0.00662278
sub10	0.0135701	0.013553	0.0125914	0.0127254	0.0100664	0.0116652	0.00909608	0.00883345	0.00775391	0.00901932	0.010216	0.0091747	0.0119331	0.0100095	0.0118256		0.00916803	0.00824114	0.00888281
sub11	0.00887427	0.00884892	0.00848086	0.0106319	0.00774343	0.00798339	0.00628572	0.00606336	0.00658218	0.00695328	0.00692891	0.00627067	0.00752406	0.00858714	0.00870918		0.00591744	0.00590159	0.00548419
sub12	0.00845109	0.0076148	0.00858768	0.00687922	0.00712226	0.0075326	0.00580859	0.00549415	0.0052165	0.00686607	0.00666672	0.00608405	0.00808958	0.00759009	0.00763017		0.0054888	0.00594193	0.00565291
sub13	0.0122117	0.012061	0.0129229	0.0117177	0.0118522	0.00875352	0.00698519	0.00931184	0.00939244	0.00972306	0.0122304	0.00960469	0.0117413	0.0117682	0.0125851		0.00921182	0.00897562	0.0232184
sub14	0.0078274	0.008282	0.006449	0.00670249	0.00703462	0.00646554	0.00498373	0.00516874	0.00450552	0.00604755	0.0059108	0.00713588	0.00668279	0.00705123	0.00703471		0.0045856	0.00496233	0.00503516
sub15	0.0118735	0.0110412	0.0109837	0.0107549	0.00991553	0.00988239	0.00777037	0.00761494	0.00709572	0.0100901	0.00904618	0.0104358	0.00810367	0.00895542	0.00822429		0.00963337	0.00823599	0.00944013
sub16	0.0108627	0.00998933	0.011086	0.00939705	0.00858972	0.0100363	0.00750405	0.00705619	0.00848294	0.00670964	0.00877698	0.00822836	0.0105814	0.00942371	0.00932619		0.00799948	0.00720573	0.00791353
sub17	0.0110266	0.0111786	0.0104279	0.00925508	0.00717208	0.00881667	0.00694431	0.00633326	0.00633962	0.0071836	0.00632025	0.00659042	0.00834149	0.00877045	0.00988526		0.00686783	0.00853781	0.00717148
sub18	0.0143631	0.0132948	0.0106085	0.0134645	0.0115944	0.0120069	0.0104452	0.0113722	0.0111416	0.00923895	0.00869699	0.0087703	0.0109846	0.00962993	0.0117136		0.0100394	0.00984415	0.0119389
cv	uphill15_Sub	uphill15_No	uphill15_Supra	uphill8_Sub	uphill8_No	uphill8_Supra	level_Sub	level_No	level_Supra	downhill8_Sub	downhill8_No	downhill8_Supra	downhill15_Sub	downhill15_No	downhill15_Supra		Level_Sub (3 min)	Level_No (3 min)	Level_Supra (3 min)
sub01	1.09856	1.04303	0.966787	0.977326	0.865251	0.802802	0.875272	0.757006	0.899028	1.70566	1.77747	1.44396	1.80705	2.14945	1.70299
sub02	1.18647	1.34184	1.3872	1.15071	1.02912	1.06254	0.985966	1.03784	1.01461	1.99692	2.55459	1.80352	2.21756	2.18014	2.31491
sub03	1.19962	1.81689	1.49034	1.76004	1.44946	1.31662	1.10831	1.33728	1.04851	2.35936	2.3493	2.37106	2.82769	2.30053	2.47114
sub04	1.20326	1.22612	1.191	1.12036	1.16283	1.13214	1.06888	1.01697	1.08313	2.05802	2.44693	2.75459	3.02617	2.71083	2.87		1.038	1.01472	1.02213
sub05	1.17223	1.54654	1.25665	1.19487	1.42388	1.37869	1.15766	1.33604	1.28575	2.12661	1.95123	2.18644	2.3013	2.32047	2.41643		1.03958	1.18466	1.11729
sub06	1.36384	1.19141	1.48982	1.12582	1.08269	1.09358	0.964235	1.01485	0.884563	2.06801	2.0475	1.99597	2.28464	2.18623	2.12157		0.957578	0.989593	0.89782
sub07	2.3325	2.08421	2.0392	2.06399	2.20404	2.09612	1.40244	1.77262	1.88953	4.0869	3.39706	3.77185	3.93607	3.60335	2.98215		1.31388	1.51327	1.73866
sub08	1.47916	1.69992	1.39318	1.26714	1.34076	1.14543	0.845944	0.83916	1.03329	2.07633	1.93793	2.138	3.08531	3.0604	2.58944		0.851684	0.845715	1.27619
sub09	1.58458	1.57957	1.50435	1.31672	1.35994	1.45242	0.967035	1.00513	1.0294	2.29539	2.54702	2.43925	2.70109	2.76315	3.40253		1.22775	1.13252	1.08272
sub10	2.16808	2.18004	2.0033	2.02357	1.61799	1.85055	1.44286	1.40702	1.23606	3.07183	3.47394	3.12847	4.11138	3.52525	4.07034		1.45755	1.31453	1.40364
sub11	1.45955	1.46181	1.38971	1.73491	1.28393	1.31955	1.01955	0.991178	1.07006	2.31503	2.31872	2.10481	2.43232	2.77324	2.8161		0.962254	0.962578	0.891738
sub12	1.37402	1.22924	1.39853	1.099	1.14641	1.21754	0.942714	0.897047	0.848011	2.12699	2.12376	1.93442	2.50872	2.36828	2.38146		0.894243	0.963332	0.91377
sub13	1.9472	1.92187	2.06688	1.87959	1.90371	1.40256	1.12934	1.521	1.53627	3.04662	3.71845	2.98509	3.52059	3.56	3.78588		1.49159	1.45194	3.7642
sub14	1.27693	1.34776	1.0548	1.0996	1.14779	1.0602	0.829105	0.859281	0.748285	1.83251	1.80609	2.18544	1.99786	2.1219	2.09931		0.761085	0.823922	0.83888
sub15	1.86401	1.73476	1.71742	1.70397	1.57085	1.55912	1.22773	1.21245	1.12269	3.45005	3.18012	3.65915	2.84103	3.16061	2.86854		1.52904	1.30746	1.49628
sub16	1.73855	1.59461	1.7784	1.5045	1.38365	1.61193	1.21164	1.12631	1.3718	2.16847	2.80352	2.62855	3.31974	2.97237	2.93681		1.29601	1.16331	1.28566
sub17	1.76045	1.77782	1.65062	1.47289	1.14723	1.41278	1.11569	1.01551	1.01641	2.27047	2.02692	2.0932	2.63045	2.83137	3.14296		1.09571	1.37328	1.15324
sub18	2.34469	2.17121	1.72002	2.1623	1.89421	1.95678	1.69778	1.82433	1.78751	2.96823	2.84902	2.86778	3.4853	3.05776	3.73295		1.6144	1.58507	1.90263

## Sheet: double support time_percent
avg	uphill15_Sub	uphill15_No	uphill15_Supra	uphill8_Sub	uphill8_No	uphill8_Supra	level_Sub	level_No	level_Supra	downhill8_Sub	downhill8_No	downhill8_Supra	downhill15_Sub	downhill15_No	downhill15_Supra		Level_Sub (3 min)	Level_No (3 min)	Level_Supra (3 min)
sub01	0.107483	0.109343	0.109601	0.104254	0.104498	0.105083	0.100836	0.167178	0.101357	0.162728	0.161485	0.163157	0.152014	0.151263	0.152855
sub02	0.109386	0.109048	0.10752	0.107091	0.106981	0.103915	0.102705	0.10442	0.104752	0.162208	0.163361	0.166667	0.157875	0.159786	0.161631
sub03	0.104199	0.101754	0.107651	0.103111	0.107817	0.105807	0.103472	0.110242	0.105398	0.172324	0.175447	0.172355	0.168489	0.164568	0.169236
sub04	0.103646	0.102622	0.105587	0.107238	0.108605	0.112706	0.101294	0.099696	0.101363	0.169276	0.178886	0.176633	0.164893	0.16324	0.171606		0.101861	0.102776	0.103141
sub05	0.092654	0.0954691	0.0972104	0.090755	0.0932941	0.089935	0.0946298	0.0946147	0.0960547	0.153676	0.157309	0.156423	0.147329	0.14428	0.146745		0.093994	0.0927711	0.0915632
sub06	0.110634	0.115571	0.114825	0.114214	0.109872	0.114028	0.111214	0.112174	0.112365	0.176994	0.176483	0.175439	0.170392	0.172624	0.170731		0.113532	0.113981	0.114402
sub07	0.129101	0.124264	0.133125	0.132971	0.135555	0.134416	0.135873	0.141946	0.139892	0.207011	0.206202	0.210442	0.197511	0.198891	0.19723		0.142603	0.135658	0.143024
sub08	0.128103	0.130074	0.130315	0.120169	0.123241	0.119636	0.113277	0.110643	0.111476	0.185988	0.186226	0.18652	0.179505	0.181601	0.180642		0.116464	0.116798	0.117428
sub09	0.115402	0.112665	0.109367	0.114387	0.110775	0.111623	0.113758	0.110395	0.1134	0.182659	0.185145	0.183488	0.170226	0.168609	0.169297		0.113467	0.115197	0.118611
sub10	0.126088	0.122331	0.128717	0.128909	0.12261	0.130496	0.130649	0.12787	0.127869	0.206421	0.205309	0.206463	0.209941	0.215925	0.209265		0.129078	0.127134	0.133254
sub11	0.108427	0.105015	0.110158	0.103988	0.102673	0.104913	0.116308	0.11166	0.11512	0.199649	0.201154	0.201994	0.190725	0.190237	0.190874		0.114916	0.112973	0.114397
sub12	0.115345	0.119586	0.118675	0.124907	0.121527	0.118589	0.115909	0.112508	0.994821	0.177057	0.18588	0.185359	0.177531	0.179502	0.179661		0.118672	0.116814	0.117529
sub13	0.127394	0.132716	0.137594	0.123496	0.122436	0.124236	0.11855	0.110114	0.112101	0.180846	0.171753	0.177947	0.166612	0.169642	0.167496		0.117707	0.117935	0.116911
sub14	0.113	0.113719	0.111597	0.109479	0.117835	0.115597	0.101046	0.101469	0.102088	0.169883	0.172886	0.173862	0.165595	0.167629	0.164922		0.1025	0.10228	0.100354
sub15	0.137075	0.13654	0.139454	0.131099	0.131255	0.134	0.132861	0.130404	0.131985	0.207724	0.215565	0.215267	0.214698	0.216601	0.213211		0.130103	0.129978	0.134273
sub16	0.125124	0.126429	0.123469	0.124418	0.121195	0.122974	0.119858	0.111843	0.118262	0.190417	0.186612	0.186327	0.181122	0.182771	0.183378		0.117124	0.119211	0.116521
sub17	0.126382	0.129121	0.131683	0.128419	0.125099	0.127662	0.122413	0.123971	0.123703	0.182984	0.188081	0.184753	0.183075	0.190161	0.18546		0.128227	0.125603	0.121857
sub18	0.112532	0.112363	0.116588	0.1226	0.115157	0.113414	0.123998	0.123368	0.123391	0.189065	0.194199	0.194268	0.184947	0.185174	0.186901		0.121857	0.121152	0.128455
sdv	uphill15_Sub	uphill15_No	uphill15_Supra	uphill8_Sub	uphill8_No	uphill8_Supra	level_Sub	level_No	level_Supra	downhill8_Sub	downhill8_No	downhill8_Supra	downhill15_Sub	downhill15_No	downhill15_Supra		Level_Sub (3 min)	Level_No (3 min)	Level_Supra (3 min)
sub01	0.00703144	0.00653883	0.00613529	0.00680895	0.00663433	0.00579599	0.00579338	0.00533456	0.00632132	0.00722016	0.00751475	0.00595531	0.00838558	0.00803774	0.00873456
sub02	0.0074191	0.00736383	0.00741149	0.00743625	0.00662493	0.00664721	0.00654912	0.00645364	0.00645557	0.00738914	0.00886036	0.00821915	0.00957623	0.00969247	0.010485
sub03	0.00721024	0.00928859	0.00756017	0.0112872	0.010505	0.00905472	0.0101805	0.0115166	0.00757294	0.010954	0.0115558	0.0111702	0.0141269	0.0115793	0.0124873
sub04	0.00738844	0.00780819	0.00819615	0.0075753	0.00810181	0.00745519	0.00685467	0.00664644	0.00688902	0.00898274	0.00924947	0.0102321	0.0120306	0.0105225	0.0103572		0.00698279	0.00657823	0.0068197
sub05	0.00743852	0.0105112	0.00962067	0.00840248	0.00970189	0.00968094	0.007835	0.00986563	0.00784077	0.00858676	0.00850563	0.00889093	0.00983527	0.0106133	0.00998863		0.00724629	0.0072756	0.00734108
sub06	0.00845283	0.00792206	0.00939363	0.0081638	0.00748401	0.00730572	0.00691987	0.00644384	0.00708377	0.00915446	0.00795722	0.00767352	0.00905732	0.00927729	0.00939432		0.00676679	0.00699655	0.00655681
sub07	0.0138199	0.0137458	0.0121067	0.0156877	0.0191366	0.0133605	0.0110198	0.0159976	0.0131665	0.0172585	0.0185623	0.0166335	0.0178835	0.0162856	0.0143576		0.0111845	0.0121333	0.0143413
sub08	0.00905369	0.00775341	0.00802124	0.00688821	0.00809519	0.00713735	0.00611515	0.00662464	0.00815968	0.00781883	0.00897038	0.00818598	0.0108096	0.0106441	0.0102694		0.00631997	0.00634986	0.0129448
sub09	0.0084791	0.00871998	0.00816203	0.00973534	0.00789699	0.00967983	0.00764929	0.00688386	0.0080596	0.00849973	0.00934472	0.00807157	0.0108877	0.0110685	0.0118905		0.00831339	0.00820527	0.0104862
sub10	0.0113644	0.0126153	0.0132913	0.0128117	0.0122098	0.0138557	0.0128577	0.0117196	0.010296	0.013191	0.0129157	0.0148811	0.0152306	0.0153972	0.0169785		0.0116375	0.0110245	0.0128785
sub11	0.00979385	0.00893461	0.00842576	0.0124952	0.00865287	0.00724552	0.00713695	0.00662498	0.00673378	0.00968947	0.00986128	0.00876364	0.0107108	0.0102686	0.0115682		0.00619812	0.00678288	0.00765357
sub12	0.00910568	0.00796289	0.0102399	0.00875068	0.00704398	0.00781247	0.00729838	0.00721747	0.01136	0.00870898	0.00994446	0.00893996	0.0111151	0.0107624	0.0118396		0.00706906	0.00754099	0.0090624
sub13	0.0111994	0.0102872	0.012118	0.0115341	0.00999278	0.00990739	0.00881038	0.0106755	0.00952366	0.0121916	0.0109267	0.00979091	0.0132368	0.0123433	0.013165		0.00941488	0.00917379	0.0121847
sub14	0.00727703	0.00799357	0.00662243	0.00640665	0.00697806	0.0068533	0.00611022	0.00617123	0.00620677	0.00793448	0.00823749	0.00832515	0.0105714	0.0100803	0.00908459		0.00560315	0.006077	0.00631301
sub15	0.0112986	0.0108288	0.0106964	0.0124614	0.00929942	0.0114643	0.012224	0.0111807	0.00895079	0.0131521	0.0136823	0.0143106	0.0155095	0.0147505	0.0135796		0.0105347	0.00956541	0.0118364
sub16	0.00979261	0.0106139	0.00887255	0.0093093	0.00942048	0.00906443	0.0079003	0.00870181	0.00710314	0.00774879	0.00957826	0.00932837	0.0111112	0.0101191	0.00964983		0.00869936	0.00719665	0.00762482
sub17	0.0100128	0.00927341	0.00961894	0.0091296	0.00845809	0.00863158	0.0087466	0.00831107	0.00765981	0.0102121	0.00864838	0.00902767	0.0103093	0.0106714	0.012044		0.0100203	0.0107081	0.00949346
sub18	0.011853	0.0105201	0.0100033	0.0128558	0.0122962	0.0112986	0.0124538	0.0112385	0.0105055	0.0131435	0.0130844	0.012429	0.0134991	0.0137351	0.0163617		0.0107486	0.0104525	0.0110588
cv	uphill15_Sub	uphill15_No	uphill15_Supra	uphill8_Sub	uphill8_No	uphill8_Supra	level_Sub	level_No	level_Supra	downhill8_Sub	downhill8_No	downhill8_Supra	downhill15_Sub	downhill15_No	downhill15_Supra		Level_Sub (3 min)	Level_No (3 min)	Level_Supra (3 min)
sub01	6.52915	5.97618	5.61048	6.57576	6.33615	5.51635	5.74098	3.19285	6.24046	4.43866	4.65583	3.65134	5.51626	5.32246	5.71203
sub02	6.78942	6.77189	6.88908	6.95074	6.17704	6.39259	6.36049	6.18515	6.16503	4.56561	5.4377	4.93299	6.07813	6.06573	6.48748
sub03	6.93372	9.10066	7.02358	10.9019	9.76765	8.54456	9.79867	10.4467	7.18768	6.34707	6.58413	6.47571	8.38267	7.03228	7.37742
sub04	7.12302	7.61914	7.76214	7.06693	7.45738	6.61472	6.76654	6.66603	6.79842	5.30655	5.17148	5.79319	7.29202	6.4454	6.04067		6.85697	6.4009	6.60659
sub05	8.02829	11.0191	9.89826	9.25928	10.3993	10.7722	8.28502	10.4272	8.16282	5.58487	5.40811	5.67708	6.67724	7.35724	6.80342		7.71717	7.85152	8.01415
sub06	7.68758	6.85469	8.1769	7.15433	6.81124	6.40195	6.22197	5.74443	6.30423	5.16695	4.50892	4.37953	5.31196	5.37262	5.50384		5.96412	6.14546	5.73065
sub07	10.6984	11.042	9.13907	11.7797	14.1173	9.92063	8.09586	11.2702	9.41738	8.32389	9.00839	7.90636	9.06877	8.1926	7.27947		7.83554	8.95075	10.0304
sub08	7.07963	5.95367	6.15451	5.75894	6.5672	5.97687	5.4134	5.98739	7.31966	4.20218	4.81866	4.39602	6.01427	5.85754	5.69549		5.42742	5.42974	11.1942
sub09	7.34749	7.73273	7.4574	8.50276	7.13662	8.67099	6.7158	6.22332	7.10726	4.65378	5.04725	4.40919	6.4102	6.60247	7.01346		7.32152	7.11268	8.84082
sub10	9.02816	10.3276	10.3211	9.97967	9.94738	10.6195	9.8767	9.15496	8.0444	6.40187	6.28397	7.23706	7.25248	7.13413	8.12514		8.99293	8.66749	9.62475
sub11	9.1385	8.56408	7.68426	12.016	8.51024	6.96618	6.1592	5.94324	5.89316	4.85636	4.90981	4.34917	5.61855	5.39937	6.06386		5.39982	6.01433	6.69038
sub12	7.89257	6.64562	8.6285	7.00574	5.81993	6.60143	6.27985	6.44966	1.17322	4.92102	5.34967	4.82749	6.24576	5.99102	6.5913		5.95681	6.4463	7.71078
sub13	8.79751	7.75131	8.8071	9.37329	8.15767	7.94131	7.43151	9.69498	8.50688	6.75443	6.37432	5.5103	7.9445	7.28323	7.8605		7.98294	7.76538	10.4459
sub14	6.42767	7.03951	5.93275	5.87956	5.92189	5.92862	6.04375	6.08454	6.13181	4.67934	4.76511	4.793	6.38921	6.0145	5.5079		5.49496	5.96152	6.3189
sub15	8.23977	7.95781	7.67264	9.50435	7.08502	8.55514	9.20075	8.57389	6.78969	6.33742	6.34772	6.66939	7.21887	6.80737	6.36373		8.09838	7.37932	8.81522
sub16	7.82519	8.3943	7.18351	7.4768	7.75429	7.37178	6.59042	7.78036	6.00024	4.10051	5.14426	5.0219	6.15682	5.56277	5.26718		7.43984	6.05273	6.53782
sub17	7.92785	7.17314	7.28816	7.10352	6.78062	6.76129	7.14316	6.69652	6.19579	5.57917	4.59304	4.88212	5.63143	5.61195	6.49483		7.81449	8.52537	7.79667
sub18	10.5461	9.36626	8.57734	10.4863	10.6778	9.96868	10.0436	9.10983	8.50915	6.94954	6.73627	6.39878	7.29774	7.43401	8.75625		8.81957	8.63089	8.60387

## Sheet: step length
avg	uphill15_Sub	uphill15_No	uphill15_Supra	uphill8_Sub	uphill8_No	uphill8_Supra	level_Sub	level_No	level_Supra	downhill8_Sub	downhill8_No	downhill8_Supra	downhill15_Sub	downhill15_No	downhill15_Supra		Level_Sub (3 min)	Level_No (3 min)	Level_Supra (3 min)
sub01	0.289084	0.301336	0.295811	0.307739	0.303782	0.299248	0.274066	0.266478	0.275659	0.633743	0.621248	0.631718	0.611683	0.60051	0.608858
sub02	0.345894	0.332297	0.343302	0.351751	0.341642	0.327147	0.319935	0.33313	0.328201	0.66603	0.680885	0.678579	0.629384	0.637567	0.626303
sub03	0.322684	0.310704	0.308767	0.308201	0.30289	0.29917	0.244024	0.249157	0.248996	0.604375	0.600717	0.604565	0.569359	0.570696	0.569125
sub04	0.305585	0.32469	0.307083	0.29957	0.30173	0.289975	0.26248	0.269832	0.256163	0.602519	0.613664	0.600266	0.56219	0.561282	0.581572		0.273626	0.27502	0.273352
sub05	0.276903	0.261895	0.266063	0.283576	0.299199	0.26679	0.244175	0.260575	0.243071	0.583768	0.588361	0.579807	0.550512	0.544861	0.549273		0.242179	0.244617	0.241055
sub06	0.309629	0.299079	0.294534	0.281458	0.290768	0.282049	0.254126	0.251498	0.257712	0.568775	0.570919	0.569899	0.540624	0.551464	0.543659		0.260429	0.252752	0.249184
sub07	0.205927	0.210045	0.228949	0.188446	0.214055	0.19562	0.162225	0.18184	0.168108	0.372396	0.359906	0.356138	0.344249	0.357572	0.347848		0.166484	0.163254	0.170272
sub08	0.380462	0.383535	0.387498	0.35255	0.348963	0.349819	0.287966	0.287848	0.288514	0.614009	0.617181	0.609359	0.544106	0.538002	0.537485		0.291534	0.288956	0.287889
sub09	0.404084	0.380654	0.391413	0.380052	0.364225	0.382849	0.311103	0.310919	0.314036	0.615054	0.613402	0.612117	0.561072	0.565318	0.565433		0.303056	0.295709	0.31195
sub10	0.319919	0.343121	0.303278	0.301327	0.29561	0.292852	0.219435	0.244293	0.212803	0.384267	0.393735	0.391769	0.372569	0.364661	0.384047		0.20286	0.200862	0.218071
sub11	0.256744	0.25852	0.26159	0.248949	0.229148	0.238655	0.155145	0.163776	0.151672	0.544516	0.54324	0.546472	0.531132	0.535937	0.527742		0.155491	0.158711	0.156176
sub12	0.366766	0.331254	0.343464	0.346831	0.33616	0.344846	0.296	0.346244	0.328646	0.61368	0.589868	0.605884	0.578442	0.570102	0.566374		0.314683	0.305278	0.321447
sub13	0.416239	0.408683	0.382474	0.394554	0.408016	0.394209	0.341646	0.340688	0.357421	0.599331	0.602424	0.602153	0.558465	0.569972	0.571149		0.323816	0.322722	0.321905
sub14	0.353037	0.370447	0.357319	0.333154	0.356233	0.349297	0.308161	0.315563	0.321594	0.651741	0.657122	0.653407	0.607807	0.604673	0.604687		0.312758	0.308148	0.313294
sub15	0.339691	0.339807	0.337905	0.293998	0.306468	0.302705	0.242869	0.275842	0.264963	0.560167	0.53676	0.540284	0.523697	0.525222	0.502181		0.227751	0.24199	0.241479
sub16	0.34492	0.354359	0.334974	0.321879	0.312191	0.335424	0.273373	0.287241	0.243795	0.577409	0.588093	0.587752	0.553158	0.538585	0.553527		0.281699	0.270385	0.259672
sub17	0.28384	0.305704	0.257767	0.248446	0.301549	0.256767	0.236695	0.274681	0.270581	0.510186	0.503779	0.508108	0.479206	0.466055	0.456511		0.206154	0.24087	0.202892
sub18	0.268369	0.249994	0.250905	0.231282	0.247007	0.230918	0.201347	0.202334	0.202252	0.476205	0.483217	0.476766	0.458763	0.45831	0.45599		0.193873	0.188275	0.201977
sdv	uphill15_Sub	uphill15_No	uphill15_Supra	uphill8_Sub	uphill8_No	uphill8_Supra	level_Sub	level_No	level_Supra	downhill8_Sub	downhill8_No	downhill8_Supra	downhill15_Sub	downhill15_No	downhill15_Supra		Level_Sub (3 min)	Level_No (3 min)	Level_Supra (3 min)
sub01	0.0273541	0.0179825	0.0198833	0.0222613	0.0221031	0.0150669	0.0174607	0.0186699	0.0156178	0.0206455	0.0219383	0.0170178	0.0221707	0.0225937	0.0219126
sub02	0.0274627	0.025779	0.0275429	0.0264216	0.0221292	0.0214813	0.0230178	0.0211357	0.0222611	0.0260284	0.0273534	0.0249865	0.0241661	0.0284973	0.026904
sub03	0.0241715	0.0317644	0.0242248	0.0347967	0.0340861	0.0281901	0.0224564	0.0291532	0.0214349	0.0295626	0.0295449	0.0309101	0.0334096	0.0330122	0.0318163
sub04	0.0224603	0.0206269	0.0195131	0.0220978	0.0214471	0.0222699	0.0155022	0.0196535	0.0172223	0.0218727	0.0226741	0.0233882	0.024871	0.0285413	0.0231416		0.0195102	0.0189755	0.0184527
sub05	0.0188543	0.022441	0.0201704	0.0207046	0.0235989	0.0218264	0.0211235	0.0227621	0.0198555	0.0214276	0.0214037	0.0227138	0.0239916	0.0204982	0.0211475		0.0184667	0.0198731	0.0219242
sub06	0.0247562	0.024622	0.0250808	0.0198761	0.0207237	0.0210072	0.0164306	0.0164679	0.0151835	0.0191928	0.0189025	0.0182229	0.0177611	0.0190541	0.0170952		0.0186881	0.017477	0.0150822
sub07	0.0337956	0.0248044	0.0301041	0.031421	0.0308051	0.0243915	0.0201145	0.0270753	0.0266007	0.0348819	0.0302297	0.030269	0.0369696	0.0338957	0.0267512		0.0219179	0.0226236	0.0316989
sub08	0.0283752	0.0287447	0.0311191	0.0282829	0.0261302	0.0264788	0.0241846	0.0199533	0.0207615	0.0233388	0.0255209	0.0237386	0.0277588	0.0259543	0.0240948		0.0235144	0.0243268	0.0229327
sub09	0.0334507	0.0246025	0.0334931	0.0278293	0.0283428	0.0328861	0.0190104	0.0238576	0.0217041	0.0203712	0.0259807	0.0241442	0.0324537	0.0245224	0.0291773		0.0275983	0.0270597	0.026345
sub10	0.029268	0.0330274	0.0343766	0.0363161	0.0277031	0.0311718	0.0286479	0.0244205	0.0211184	0.0267751	0.0317563	0.0312216	0.037084	0.0277096	0.0348054		0.0242002	0.020695	0.0279945
sub11	0.0228099	0.0274572	0.0227734	0.0274261	0.0234115	0.0234017	0.0186371	0.0178121	0.0203214	0.0325038	0.0299047	0.0255489	0.0318928	0.0289877	0.0303403		0.0176015	0.0199298	0.018038
sub12	0.0293707	0.0227909	0.025545	0.0220973	0.0262993	0.0297547	0.0194066	0.0209031	0.0192635	0.0220252	0.0230766	0.0218457	0.02375	0.0266922	0.0246463		0.019483	0.0237295	0.0198083
sub13	0.0458769	0.0429652	0.0397087	0.0410529	0.0351452	0.0372285	0.0261829	0.0283799	0.0287926	0.0373931	0.0507665	0.0424285	0.0392931	0.0451473	0.0455131		0.0278214	0.0357382	0.0483597
sub14	0.0255124	0.0283114	0.0200774	0.0216722	0.0224715	0.0206708	0.0182717	0.01828	0.0182378	0.0216474	0.0222548	0.0216207	0.0292456	0.0247894	0.0223946		0.018381	0.0208884	0.0175061
sub15	0.0391198	0.039697	0.0408393	0.0389494	0.036113	0.0362103	0.0281924	0.0282403	0.0262802	0.0451821	0.0347223	0.0342354	0.0353916	0.0345541	0.031951		0.0319269	0.0249537	0.0300682
sub16	0.0361416	0.0314037	0.0319213	0.0284892	0.0239477	0.02713	0.0205654	0.0227652	0.0224202	0.0243693	0.0317559	0.0306071	0.0335489	0.0295128	0.0324221		0.0270611	0.0212145	0.0218627
sub17	0.0309223	0.0319873	0.0335069	0.0266867	0.022643	0.0257759	0.0214153	0.0217395	0.0213097	0.0251947	0.0208344	0.0206131	0.0293245	0.0245739	0.0271167		0.0231555	0.0292324	0.0228734
sub18	0.0255016	0.0284672	0.0237272	0.031244	0.0248575	0.0288915	0.0212154	0.0256444	0.0261681	0.0339546	0.0308572	0.0278292	0.033247	0.0280931	0.0342566		0.0228661	0.0226491	0.0250922
cv	uphill15_Sub	uphill15_No	uphill15_Supra	uphill8_Sub	uphill8_No	uphill8_Supra	level_Sub	level_No	level_Supra	downhill8_Sub	downhill8_No	downhill8_Supra	downhill15_Sub	downhill15_No	downhill15_Supra		Level_Sub (3 min)	Level_No (3 min)	Level_Supra (3 min)
sub01	9.39095	5.94452	6.7659	7.31753	7.37618	5.08433	6.35359	7.09933	5.63436	3.25608	3.53139	2.69371	3.62257	3.75958	3.5942
sub02	7.9453	7.80767	8.04659	7.51471	6.53317	6.5364	7.22769	6.40627	6.81569	3.91184	4.02021	3.68068	3.84207	4.46684	4.29641
sub03	7.51049	10.1955	7.85187	11.2255	11.2038	9.37378	9.11694	11.8262	8.53836	4.89035	4.91872	5.11278	5.8674	5.7829	5.59382
sub04	7.36809	6.34851	6.35716	7.402	7.10691	7.67812	5.90151	7.30417	6.70332	3.62982	3.69504	3.89806	4.42362	5.08498	3.97913		7.13142	6.88333	6.7659
sub05	6.77651	8.50558	7.55619	7.2399	7.91578	8.23664	8.77929	8.78394	8.22659	3.67028	3.6373	3.91794	4.35901	3.76191	3.84981		7.73282	8.06551	9.21399
sub06	7.96436	8.23892	8.50137	7.11392	7.09886	7.46979	6.47737	6.56186	5.90532	3.37327	3.30999	3.19803	3.28486	3.45498	3.14651		7.17766	6.91237	6.04595
sub07	16.4662	11.766	13.2203	16.8173	14.3991	12.4114	12.4164	14.9018	15.8559	9.3763	8.40441	8.50137	10.7381	9.48305	7.69083		13.1482	13.8251	18.6253
sub08	7.45312	7.51854	8.05783	8.01377	7.47336	7.53723	8.40123	6.93021	7.19769	3.80124	4.14042	3.89624	5.09856	4.82254	4.48688		8.04405	8.46356	7.95778
sub09	8.27456	6.43238	8.52119	7.31713	7.76273	8.60581	6.0906	7.71761	6.93055	3.32201	4.24148	3.94558	5.78552	4.33712	5.16029		9.10227	9.16229	8.44025
sub10	9.15255	9.60735	11.3091	12.0412	9.36271	10.6577	13.1096	9.9989	9.90612	6.95421	8.06617	7.97083	9.95011	7.59859	9.06091		11.9393	10.3057	12.8432
sub11	8.95267	10.5817	8.71636	11.0602	10.3156	9.91677	11.9578	10.9071	13.4477	5.97546	5.50559	4.67959	6.00361	5.41229	5.75748		11.2619	12.4402	11.5394
sub12	8.03616	6.85371	7.47706	6.37658	7.82696	8.71048	6.58713	6.04905	5.86284	3.5885	3.91277	3.6082	4.1099	4.68089	4.35069		6.20612	7.75209	6.1672
sub13	10.9952	10.5227	10.4324	10.3876	8.60465	9.48778	7.65307	8.28069	8.05311	6.24285	8.41606	7.04342	7.03626	7.9056	7.97537		8.5812	11.0935	15.013
sub14	7.23006	7.63801	5.61656	6.48971	6.30534	5.91232	5.92879	5.80092	5.6677	3.32386	3.38789	3.30897	4.8118	4.09975	3.7033		5.88441	6.78362	5.58431
sub15	11.5093	11.7022	12.0717	13.2175	11.7939	11.9411	11.6085	10.2377	9.88263	8.06345	6.47123	6.33583	6.76111	6.5775	6.36775		14.1134	10.3401	12.4939
sub16	10.4798	8.86623	9.50901	8.86906	7.62839	8.10433	7.5034	7.91281	9.20267	4.22791	5.39987	5.21404	6.06497	5.47914	5.8573		9.59339	7.85098	8.41856
sub17	10.8051	10.4164	13.0819	10.7197	7.45398	10.0985	9.07	7.955	7.90322	4.93646	4.13522	4.05764	6.12028	5.27298	5.93892		11.2208	12.0909	11.3088
sub18	9.53991	11.3987	9.42681	13.5407	10.0756	12.581	10.5368	12.6981	12.8777	7.12958	6.38572	5.83968	7.25546	6.12966	7.51092		11.8112	12.0225	12.4224

## Sheet: stride length
avg	uphill15_Sub	uphill15_No	uphill15_Supra	uphill8_Sub	uphill8_No	uphill8_Supra	level_Sub	level_No	level_Supra	downhill8_Sub	downhill8_No	downhill8_Supra	downhill15_Sub	downhill15_No	downhill15_Supra		Level_Sub (3 min)	Level_No (3 min)	Level_Supra (3 min)
sub01	1.60015	1.64322	1.63833	1.65461	1.65199	1.6539	1.62633	1.44518	1.63171	1.53994	1.51113	1.53591	1.47712	1.45224	1.47112
sub02	1.77519	1.7383	1.76151	1.78504	1.7554	1.72712	1.72876	1.73872	1.75686	1.60233	1.62924	1.63077	1.52126	1.54035	1.51869
sub03	1.59998	1.57085	1.58546	1.6106	1.61664	1.60216	1.51758	1.52663	1.52083	1.45719	1.44682	1.45193	1.37715	1.37886	1.37892
sub04	1.60973	1.64045	1.61416	1.65191	1.65235	1.61483	1.58486	1.59809	1.56767	1.47026	1.50833	1.47564	1.37658	1.37502	1.42438		1.61525	1.61267	1.61924
sub05	1.46041	1.41108	1.43826	1.4874	1.49828	1.43609	1.50576	1.51569	1.48103	1.41801	1.43437	1.41189	1.33735	1.32129	1.33268		1.52011	1.50693	1.49659
sub06	1.5751	1.5583	1.54673	1.55935	1.54634	1.55476	1.50102	1.47932	1.50633	1.39464	1.39416	1.39173	1.32253	1.34612	1.32869		1.51481	1.50502	1.49717
sub07	1.01453	1.01242	1.05825	1.03201	1.06764	1.02538	1.03199	1.0696	1.05424	0.972299	0.935887	0.931135	0.903612	0.921543	0.903004		1.05836	1.03168	1.0714
sub08	1.78097	1.79475	1.81471	1.74048	1.74761	1.74463	1.63576	1.64879	1.64831	1.51935	1.52379	1.50846	1.35587	1.34284	1.34316		1.65629	1.65732	1.64946
sub09	1.75684	1.67972	1.72952	1.73062	1.66275	1.7318	1.63429	1.62185	1.60434	1.49302	1.49731	1.48786	1.36123	1.36994	1.36976		1.63181	1.62778	1.63348
sub10	1.27528	1.30285	1.2481	1.27372	1.24133	1.24984	1.13833	1.18134	1.12225	1.00729	1.02895	1.02679	0.976303	0.9625	1.00563		1.11	1.09587	1.15164
sub11	1.47177	1.4563	1.48764	1.508	1.43996	1.45395	1.42285	1.43263	1.41474	1.35021	1.34822	1.35717	1.29933	1.30861	1.29339		1.41697	1.41691	1.42743
sub12	1.61368	1.55745	1.57683	1.62022	1.59447	1.6125	1.55409	1.61374	1.59572	1.50638	1.46535	1.49912	1.41857	1.40121	1.39424		1.57548	1.56938	1.59216
sub13	1.73955	1.73271	1.68434	1.71066	1.71305	1.70812	1.6235	1.59883	1.61087	1.48015	1.47009	1.47982	1.3609	1.38937	1.38834		1.59601	1.60063	1.60684
sub14	1.82022	1.85909	1.8302	1.79	1.82866	1.8048	1.72397	1.72702	1.74827	1.59987	1.61786	1.60847	1.50133	1.49847	1.49383		1.74309	1.73261	1.72741
sub15	1.60977	1.60313	1.62126	1.538	1.55519	1.56489	1.46061	1.50772	1.5039	1.42516	1.38051	1.39227	1.35857	1.3579	1.30131		1.41972	1.4486	1.45029
sub16	1.53374	1.54065	1.5129	1.51768	1.48131	1.54024	1.44765	1.46771	1.38483	1.37899	1.39113	1.39169	1.31052	1.27805	1.31604		1.44396	1.43649	1.3963
sub17	1.37034	1.42184	1.34319	1.34214	1.42113	1.35181	1.29322	1.37652	1.35882	1.26836	1.25889	1.26639	1.20031	1.17413	1.14554		1.26997	1.31359	1.24788
sub18	1.23058	1.19119	1.2217	1.24891	1.23829	1.2072	1.24217	1.22468	1.23447	1.17415	1.19269	1.17967	1.11823	1.11752	1.1176		1.2248	1.20829	1.25854
sdv	uphill15_Sub	uphill15_No	uphill15_Supra	uphill8_Sub	uphill8_No	uphill8_Supra	level_Sub	level_No	level_Supra	downhill8_Sub	downhill8_No	downhill8_Supra	downhill15_Sub	downhill15_No	downhill15_Supra		Level_Sub (3 min)	Level_No (3 min)	Level_Supra (3 min)
sub01	0.0373459	0.0222522	0.0210596	0.0256706	0.022048	0.0158715	0.0170906	0.0208578	0.0174589	0.0236911	0.0331872	0.0186199	0.0263423	0.0283182	0.0233778
sub02	0.0295775	0.0320964	0.0333796	0.0313872	0.0263106	0.0272416	0.0351241	0.0284526	0.0327919	0.031573	0.0380442	0.0228936	0.0251285	0.0273644	0.0282709
sub03	0.032942	0.042824	0.0272359	0.0429699	0.0345136	0.0299799	0.0255023	0.0293666	0.0254542	0.0305788	0.0260798	0.0298354	0.0316095	0.0291322	0.0288312
sub04	0.0250131	0.0284811	0.0257201	0.0243409	0.0278743	0.0268747	0.0199048	0.0213877	0.0190746	0.0253495	0.027754	0.0292929	0.0302399	0.0322641	0.0278255		0.0222366	0.0246706	0.0215
sub05	0.0236936	0.0278958	0.0265433	0.0245362	0.0240064	0.0259314	0.0216353	0.025177	0.0245165	0.0237908	0.0213013	0.0247142	0.0259759	0.0233888	0.0238204		0.022271	0.0252689	0.0255884
sub06	0.0396025	0.0351194	0.0306191	0.0270917	0.0331851	0.0372308	0.0210218	0.0230135	0.0244349	0.0220215	0.0228164	0.019562	0.01807	0.0184576	0.0196381		0.0261288	0.025477	0.0244844
sub07	0.0449477	0.0376727	0.0435206	0.0368777	0.0448425	0.0366137	0.0250228	0.0402133	0.0408709	0.0435757	0.0348726	0.0342429	0.0330828	0.0338764	0.0261566		0.0332133	0.0271473	0.0411565
sub08	0.0363096	0.0396148	0.0363706	0.0328041	0.0339995	0.0293884	0.024265	0.0234961	0.0241746	0.0208466	0.0235589	0.0222438	0.0295781	0.0259425	0.0225045		0.0252595	0.0261801	0.02823
sub09	0.0439301	0.0400583	0.045174	0.0368471	0.0385593	0.0402285	0.0230425	0.0223167	0.0260997	0.0262936	0.0283569	0.024964	0.0338751	0.0295952	0.0353031		0.0286855	0.0256907	0.02967
sub10	0.051606	0.0664367	0.0550038	0.0734958	0.0437759	0.0509115	0.0548887	0.0433349	0.0271112	0.0360568	0.036705	0.0437918	0.0308093	0.0273239	0.0396302		0.0385345	0.0332089	0.0471064
sub11	0.0289023	0.0285362	0.0249064	0.0403727	0.0262395	0.0284387	0.0200704	0.0178546	0.0174271	0.0252584	0.0246037	0.0242794	0.0288906	0.0291402	0.0334003		0.0168726	0.0185823	0.0176792
sub12	0.0378588	0.0260168	0.0328217	0.0309002	0.0386943	0.0380916	0.0223794	0.0193931	0.0210906	0.0241963	0.0245826	0.0204071	0.025605	0.028769	0.0289567		0.0201397	0.0260936	0.023404
sub13	0.0720501	0.0725109	0.0589056	0.060098	0.0587561	0.0480342	0.0437192	0.0432715	0.043208	0.0406818	0.0482056	0.0484462	0.0441301	0.0393686	0.0486694		0.0480718	0.041372	0.0426349
sub14	0.0281265	0.0305231	0.0239722	0.0248762	0.0231086	0.019141	0.015123	0.0181226	0.0182715	0.0224157	0.0250053	0.0241545	0.0311674	0.0242927	0.024264		0.0164759	0.0199877	0.0202225
sub15	0.0583532	0.0798852	0.0580463	0.0616671	0.046019	0.0596211	0.0437742	0.045062	0.038072	0.0477361	0.0417025	0.0447751	0.0401127	0.0545509	0.043546		0.0538599	0.0503908	0.0499995
sub16	0.04417	0.0408869	0.0366033	0.0406053	0.0338245	0.0345631	0.0275067	0.0277191	0.0248355	0.0241603	0.036094	0.0349777	0.0355411	0.0307639	0.0313129		0.0371861	0.0273322	0.0249116
sub17	0.0358136	0.0380923	0.0390632	0.0295662	0.0223408	0.0295319	0.0230078	0.0252868	0.0233027	0.022774	0.0228372	0.0222145	0.0297358	0.0250489	0.0339582		0.0266322	0.0370634	0.027696
sub18	0.0397758	0.0422861	0.0335698	0.053819	0.038007	0.0432466	0.0295687	0.0389165	0.0347728	0.0320422	0.027941	0.0269282	0.0303993	0.0271391	0.0310633		0.0385795	0.0356658	0.049258
cv	uphill15_Sub	uphill15_No	uphill15_Supra	uphill8_Sub	uphill8_No	uphill8_Supra	level_Sub	level_No	level_Supra	downhill8_Sub	downhill8_No	downhill8_Supra	downhill15_Sub	downhill15_No	downhill15_Supra		Level_Sub (3 min)	Level_No (3 min)	Level_Supra (3 min)
sub01	2.33379	1.35401	1.28538	1.55132	1.33455	0.959502	1.05118	1.44322	1.07052	1.53808	2.19605	1.21211	1.78298	1.94915	1.58873
sub02	1.66622	1.8463	1.8949	1.75807	1.49877	1.57767	2.0315	1.63706	1.86683	1.97043	2.33527	1.4039	1.65219	1.77692	1.86153
sub03	2.05858	2.72594	1.71672	2.66753	2.13453	1.8711	1.67917	1.92339	1.67356	2.09844	1.80296	2.05535	2.29529	2.11377	2.09064
sub04	1.55484	1.73682	1.59313	1.47373	1.68702	1.66324	1.25588	1.33841	1.21666	1.72433	1.84071	1.98578	2.19652	2.34742	1.95342		1.37665	1.52986	1.32774
sub05	1.62232	1.97585	1.84442	1.64942	1.60212	1.80483	1.43676	1.65958	1.65476	1.67728	1.48451	1.75027	1.94362	1.76956	1.78731		1.46541	1.67706	1.7092
sub06	2.51754	2.25492	1.97979	1.7381	2.14539	2.39559	1.39981	1.55544	1.62215	1.5786	1.63592	1.40548	1.36504	1.37078	1.4784		1.72541	1.69176	1.63481
sub07	4.42985	3.72097	4.11243	3.57384	4.20051	3.5708	2.42464	3.75969	3.8769	4.48099	3.72659	3.67704	3.66076	3.6764	2.89661		3.13786	2.6312	3.84107
sub08	2.04305	2.2091	2.00528	1.88448	1.94552	1.68422	1.48522	1.42601	1.46645	1.3721	1.54671	1.47546	2.18136	1.93044	1.67483		1.52498	1.5802	1.70985
sub09	2.49908	2.38556	2.61302	2.12888	2.31508	2.32018	1.41148	1.37595	1.62769	1.76185	1.89487	1.67828	2.48934	2.16146	2.57761		1.76132	1.58068	1.81925
sub10	4.04551	5.0918	4.40411	5.77021	3.52651	4.07317	4.82181	3.66831	2.4159	3.5802	3.56705	4.2654	3.1559	2.83958	3.94008		3.47153	3.03038	4.09026
sub11	1.96336	1.95897	1.67414	2.67675	1.82193	1.95665	1.41079	1.24652	1.23179	1.87116	1.82494	1.78899	2.22262	2.2263	2.58294		1.19094	1.31135	1.23864
sub12	2.34621	1.67037	2.08145	1.90688	2.42674	2.36209	1.43968	1.20155	1.3219	1.6065	1.67744	1.3611	1.80479	2.05294	2.07676		1.27854	1.66197	1.46969
sub13	4.14304	4.18402	3.49759	3.51567	3.4301	2.81282	2.6935	2.70609	2.68443	2.74781	3.27863	3.27414	3.24297	2.83242	3.50743		3.0131	2.58465	2.65246
sub14	1.54501	1.64159	1.30993	1.3898	1.26361	1.06042	0.876527	1.049	1.04531	1.40111	1.54515	1.50217	2.07644	1.62117	1.62433		0.94558	1.15339	1.1703
sub15	3.62555	4.98428	3.58072	4.01001	2.95933	3.81007	2.99839	2.98908	2.53135	3.35137	3.02236	3.21821	2.95263	4.01744	3.34559		3.79643	3.47862	3.44826
sub16	2.88012	2.65416	2.42109	2.67492	2.28259	2.24399	1.89987	1.88944	1.79307	1.75127	2.59435	2.51236	2.71272	2.40664	2.38338		2.5761	1.90214	1.78319
sub17	2.61406	2.6793	2.90855	2.20282	1.57323	2.18489	1.77916	1.83684	1.71521	1.79652	1.81445	1.75346	2.47636	2.13345	2.96391		2.09637	2.82166	2.21925
sub18	3.2345	3.55028	2.74892	4.30798	3.07071	3.58532	2.38137	3.1778	2.81616	2.72988	2.34206	2.28138	2.71397	2.428	2.77999		3.14911	2.95203	3.91487

## Sheet: step width
avg	uphill15_Sub	uphill15_No	uphill15_Supra	uphill8_Sub	uphill8_No	uphill8_Supra	level_Sub	level_No	level_Supra	downhill8_Sub	downhill8_No	downhill8_Supra	downhill15_Sub	downhill15_No	downhill15_Supra		Level_Sub (3 min)	Level_No (3 min)	Level_Supra (3 min)
sub01	0.188968	0.177226	0.167411	0.191146	0.193211	0.179922	0.206685	0.0791496	0.21381	0.101213	0.120568	0.105431	0.125799	0.121979	0.128699
sub02	0.173304	0.167633	0.168954	0.176215	0.15533	0.166288	0.177865	0.188269	0.18149	0.123017	0.132346	0.107868	0.119735	0.118673	0.120593
sub03	0.194133	0.210178	0.181567	0.21422	0.209054	0.191512	0.218102	0.214326	0.198687	0.0525387	0.0472279	0.0591444	0.0594292	0.0670286	0.0526581
sub04	0.164485	0.169662	0.160491	0.170186	0.169087	0.171432	0.179358	0.178592	0.170745	0.100632	0.113831	0.101713	0.109452	0.113098	0.118177		0.168328	0.179378	0.170155
sub05	0.156803	0.161171	0.16106	0.156989	0.154515	0.161216	0.194479	0.189555	0.194887	0.134841	0.143962	0.136421	0.136512	0.143372	0.141216		0.208031	0.204046	0.196871
sub06	0.129983	0.122353	0.134802	0.156249	0.148547	0.150759	0.1826	0.197041	0.192117	0.0836123	0.082485	0.0895746	0.0840282	0.0868406	0.0825874		0.192201	0.195695	0.191778
sub07	0.207634	0.221206	0.206342	0.213933	0.227201	0.198135	0.213622	0.212101	0.211376	0.130264	0.135207	0.135567	0.127884	0.131469	0.128903		0.20939	0.222008	0.211049
sub08	0.198768	0.193971	0.198028	0.222479	0.232867	0.210946	0.271514	0.270818	0.281917	0.122002	0.113846	0.119309	0.125823	0.154092	0.138203		0.274453	0.274805	0.266674
sub09	0.212234	0.219911	0.218554	0.213604	0.233614	0.212711	0.259048	0.262403	0.257017	0.16627	0.179333	0.152015	0.167243	0.150693	0.156544		0.249936	0.256518	0.25587
sub10	0.175461	0.178544	0.176476	0.175413	0.157227	0.169782	0.197194	0.176542	0.192528	0.121761	0.125792	0.118775	0.126311	0.128539	0.129164		0.203846	0.196692	0.196184
sub11	0.14866	0.145449	0.135529	0.169618	0.151844	0.139814	0.199039	0.188587	0.203427	0.143276	0.137655	0.136359	0.14741	0.141635	0.134961		0.202364	0.198953	0.201042
sub12	0.186354	0.164054	0.193822	0.215117	0.19776	0.204133	0.230825	0.201958	0.215306	0.109073	0.144004	0.11276	0.11728	0.140486	0.13639		0.230786	0.235909	0.226835
sub13	0.140683	0.137674	0.141903	0.149315	0.146123	0.130337	0.165171	0.153757	0.152677	0.147971	0.15212	0.142668	0.137731	0.134756	0.132277		0.177952	0.17941	0.159703
sub14	0.19642	0.18923	0.185218	0.227545	0.20548	0.22181	0.225877	0.212333	0.218371	0.117765	0.11568	0.118468	0.118449	0.121935	0.125079		0.224026	0.232726	0.232588
sub15	0.234288	0.207509	0.24079	0.26824	0.240621	0.250363	0.27667	0.268442	0.268696	0.13958	0.137822	0.155116	0.125714	0.146782	0.14348		0.2736	0.277529	0.277904
sub16	0.217088	0.220763	0.226949	0.261664	0.218104	0.246541	0.272781	0.258336	0.264633	0.146827	0.161274	0.152115	0.177445	0.193577	0.169303		0.291777	0.273076	0.28428
sub17	0.167105	0.162805	0.168632	0.178009	0.167486	0.171935	0.196082	0.211861	0.192811	0.133357	0.13118	0.126713	0.151457	0.165069	0.151388		0.213951	0.207934	0.209694
sub18	0.121462	0.133626	0.133336	0.134319	0.135396	0.134969	0.165705	0.16081	0.153333	0.10016	0.085773	0.0904774	0.0868415	0.0872773	0.0944274		0.18132	0.185008	0.167844
sdv	uphill15_Sub	uphill15_No	uphill15_Supra	uphill8_Sub	uphill8_No	uphill8_Supra	level_Sub	level_No	level_Supra	downhill8_Sub	downhill8_No	downhill8_Supra	downhill15_Sub	downhill15_No	downhill15_Supra		Level_Sub (3 min)	Level_No (3 min)	Level_Supra (3 min)
sub01	0.0132891	0.0120245	0.0109048	0.0150964	0.015022	0.0103886	0.0110366	0.008615	0.0130386	0.015477	0.0193539	0.0181655	0.0210288	0.0203167	0.017308
sub02	0.0141273	0.0129762	0.0145396	0.013155	0.0136105	0.0137917	0.0120974	0.0147929	0.0150779	0.0186481	0.018365	0.0178627	0.0205752	0.0216546	0.0205076
sub03	0.0273841	0.0372156	0.0221978	0.039683	0.0394621	0.0297516	0.0364694	0.0438022	0.0311199	0.0332837	0.032375	0.0352074	0.0349399	0.0337917	0.0300674
sub04	0.0147988	0.0153356	0.0158149	0.0187282	0.0163804	0.0164719	0.0144412	0.0153298	0.0147221	0.0189537	0.0199559	0.0188827	0.0218021	0.0220014	0.0248131		0.018127	0.0177151	0.0162445
sub05	0.0141315	0.0147854	0.0151076	0.0142348	0.0117914	0.0145169	0.0128492	0.0133081	0.0119067	0.0185038	0.019873	0.0196793	0.0187666	0.0200381	0.0175847		0.0142103	0.0165526	0.0134137
sub06	0.0135229	0.0125304	0.0123032	0.0139353	0.0138742	0.0130995	0.0148816	0.0122137	0.0137881	0.0160094	0.0140454	0.0160965	0.0184452	0.0194981	0.0187189		0.0153282	0.0156148	0.0146336
sub07	0.0183521	0.0185157	0.020325	0.0196301	0.0205047	0.0148633	0.0158482	0.0131324	0.0178168	0.0301222	0.0298597	0.0295067	0.0316647	0.0319833	0.0301047		0.0176697	0.0195466	0.0176833
sub08	0.0153365	0.0158625	0.0155678	0.0169098	0.0182278	0.0194432	0.016839	0.0185756	0.0153471	0.0240152	0.0233092	0.0231814	0.0272362	0.0240733	0.0230642		0.0193176	0.0160662	0.0206788
sub09	0.0134279	0.0137416	0.0129001	0.0146549	0.0138357	0.0154579	0.0145658	0.0159827	0.0145576	0.0180879	0.0224054	0.019831	0.022403	0.0206233	0.0258542		0.0198061	0.0162553	0.0160318
sub10	0.0238755	0.0233703	0.0211432	0.0257665	0.0200154	0.022072	0.0167637	0.0217446	0.0191105	0.0286251	0.0231104	0.027193	0.0269182	0.0283569	0.0261866		0.0171243	0.0169304	0.0189924
sub11	0.0183709	0.0188596	0.0179655	0.0175594	0.0176387	0.0167462	0.0188827	0.0177842	0.0182416	0.0289739	0.0298083	0.0278225	0.0298414	0.030596	0.0274141		0.0193455	0.0205929	0.0163216
sub12	0.0150901	0.0173632	0.0144129	0.0132851	0.0142175	0.0141892	0.0167772	0.0132932	0.0111107	0.0202138	0.027321	0.0200668	0.0220647	0.0281621	0.0266419		0.0132505	0.0148312	0.011763
sub13	0.0262859	0.0270516	0.0309706	0.029251	0.0320987	0.0252385	0.0266021	0.0326932	0.035722	0.0347192	0.0372764	0.0404308	0.0495438	0.0417151	0.039863		0.0317215	0.0332979	0.0322751
sub14	0.019859	0.0213964	0.0197847	0.019398	0.0170157	0.0211187	0.0208224	0.0169149	0.0208596	0.0250064	0.0285793	0.0277645	0.0315375	0.0277724	0.0263833		0.0232886	0.0225195	0.0234069
sub15	0.0335025	0.0216719	0.025276	0.0331081	0.0327627	0.0297928	0.0328344	0.0200659	0.0243099	0.0327179	0.032709	0.0286011	0.0289957	0.0348517	0.0315412		0.0281167	0.0277553	0.0293879
sub16	0.0206737	0.0177498	0.0213778	0.0278736	0.0205476	0.0232505	0.02679	0.0201466	0.0177845	0.0235415	0.0321501	0.0253346	0.029019	0.0248747	0.0273769		0.0217384	0.0196963	0.019515
sub17	0.0163015	0.0124368	0.0159172	0.017473	0.01293	0.0165387	0.0126492	0.0152446	0.0120214	0.0204027	0.0190011	0.0182901	0.0220433	0.0188658	0.0313882		0.0133576	0.0152184	0.0137664
sub18	0.0168606	0.0156807	0.0151211	0.0209003	0.01526	0.0183087	0.0147318	0.0162715	0.0172268	0.018105	0.0239645	0.0214229	0.0229182	0.0294109	0.0224128		0.0187398	0.0166212	0.015886
cv	uphill15_Sub	uphill15_No	uphill15_Supra	uphill8_Sub	uphill8_No	uphill8_Supra	level_Sub	level_No	level_Supra	downhill8_Sub	downhill8_No	downhill8_Supra	downhill15_Sub	downhill15_No	downhill15_Supra		Level_Sub (3 min)	Level_No (3 min)	Level_Supra (3 min)
sub01	7.03208	6.7847	6.51384	7.89796	7.77552	5.77388	5.33977	10.8856	6.09818	15.2915	16.0521	17.2313	16.7167	16.6553	13.4483
sub02	8.15168	7.74094	8.60543	7.4646	8.76188	8.2943	6.80114	7.85747	8.30748	15.1591	13.8756	16.5622	17.1838	18.2449	17.0049
sub03	14.1042	17.7068	12.226	18.5206	18.8679	15.5358	16.7214	20.4378	15.6614	63.3361	68.5287	59.5369	58.7875	50.4171	57.1083
sub04	8.99757	9.03879	9.85422	11.0045	9.68649	9.60855	8.0511	8.5842	8.62208	18.835	17.5336	18.564	19.9234	19.4529	20.9974		10.7685	9.87569	9.54694
sub05	9.01209	9.1737	9.38002	9.06736	7.63133	9.0037	6.60674	7.0202	6.1094	13.7226	13.8043	14.4257	13.7471	13.9763	12.4528		6.83071	8.11219	6.81351
sub06	10.4036	10.2409	9.1265	8.9185	9.33999	8.68871	8.14941	6.19845	7.17708	19.1489	17.0265	17.9717	21.9524	22.4528	22.665		7.97515	7.97917	7.63053
sub07	8.83873	8.37072	9.85009	9.1759	9.0251	7.50165	7.41864	6.19156	8.42916	23.1259	22.0832	21.7654	24.7599	24.3285	23.3542		8.43845	8.80421	8.37876
sub08	7.71575	8.17762	7.86195	7.60033	7.82747	9.21839	6.20191	6.85907	5.4436	19.6893	20.4729	19.4297	21.6487	15.622	16.6896		7.03871	5.8465	7.75379
sub09	6.32707	6.24845	5.90246	6.86098	5.9227	7.26723	5.62218	6.09078	5.66409	10.8786	12.4935	13.0456	13.3944	13.6857	16.5154		7.92441	6.3371	6.26563
sub10	13.6081	13.0894	11.981	14.6884	12.7297	13.0001	8.50292	12.3168	9.92512	23.5157	18.3715	22.8944	21.3123	22.0563	20.2752		8.40081	8.60788	9.68093
sub11	12.3581	12.9667	13.2545	10.3519	11.6143	11.9773	9.487	9.43098	8.96832	20.2231	21.6513	20.4019	20.2427	21.6001	20.3148		9.56028	10.3506	8.11881
sub12	8.09744	10.5845	7.43544	6.17577	7.18917	6.95109	7.26824	6.58256	5.16025	18.5331	18.9722	17.7965	18.8151	20.0458	19.5337		5.74152	6.28689	5.18567
sub13	18.6829	19.6484	21.821	19.5993	21.9708	19.3635	16.106	21.2702	23.3985	23.4653	24.5037	28.3345	35.9753	30.9558	30.1298		17.8251	18.5576	20.2113
sub14	10.1106	11.3073	10.6819	8.52505	8.28061	9.52146	9.21796	7.96672	9.55164	21.2329	24.7062	23.4374	26.6293	22.7748	21.0912		10.3957	9.67802	10.0638
sub15	14.2973	10.4433	10.4977	12.3413	13.6135	11.9002	11.8671	7.47505	9.04739	23.4374	23.7329	18.4395	23.0674	23.743	21.9849		10.2765	10.0005	10.5741
sub16	9.52313	8.0398	9.41991	10.6525	9.42103	9.43047	9.82185	7.79924	6.72066	16.0321	19.9369	16.6539	16.3531	12.8509	16.1704		7.4503	7.21268	6.86473
sub17	9.75289	7.6389	9.43929	9.81588	7.72011	9.61714	6.45089	7.19641	6.23531	15.2992	14.4854	14.4345	14.5567	11.4282	20.7343		6.24328	7.31884	6.56493
sub18	13.881	11.7339	11.3412	15.5603	11.2705	13.5647	8.89039	10.1189	11.2348	18.075	27.9396	23.6774	26.3913	33.6977	23.7411		10.3352	8.98414	9.4648
